# Hippocampus Modulates Natural Sound Processing at Early

## Auditory Centers

Eddie C. Wong<sup>1,2</sup>, Xunda Wang<sup>1,2</sup>, Ed X. Wu<sup>1,2,3\*</sup>, Alex T. L. Leong<sup>1,2\*</sup>

<sup>1</sup>Laboratory of Biomedical Imaging and Signal Processing, The University of Hong Kong, Pokfulam, Hong Kong SAR, China

<sup>2</sup>Department of Electrical and Electronic Engineering, The University of Hong Kong, Pokfulam, Hong Kong SAR, China

<sup>3</sup>School of Biomedical Sciences, LKS Faculty of Medicine, The University of Hong Kong, Pokfulam, Hong Kong SAR, China

\*Correspondence should be addressed to Ed X. Wu, Ph.D. and Alex T. L. Leong, Ph.D.:  
Laboratory of Biomedical Imaging and Signal Processing, Department of Electrical and Electronic Engineering, The University of Hong Kong, Pokfulam, Hong Kong, Hong Kong SAR, China.

Fax: +852-2859-8738.

Tel: +852-2859-7096.

Email: [ewu@eee.hku.hk](mailto:ewu@eee.hku.hk) & [tlleong@eee.hku.hk](mailto:tlleong@eee.hku.hk)

### Keywords

fMRI; Auditory system; Hippocampus; Inferior colliculus; Medial geniculate body; Auditory cortex; Optogenetics; Vocalizations

### Author Contributions

E.C.W., A.T.L.L., and E.X.W. designed research; E.C.W. performed research; E.C.W., X.W., A.T.L.L., and E.X.W. analyzed data; X.W. provided technical assistance; and E.C.W., A.T.L.L., and E.X.W. wrote the paper.

## 28 **Abstract**

29 Despite its prominence in learning and memory, hippocampal influence in early auditory  
30 processing centers remains unknown. Here, we examined how hippocampal activity modulates  
31 sound-evoked responses in the auditory midbrain and thalamus using optogenetics and functional  
32 MRI (fMRI) in rodents. Ventral hippocampus (vHP) excitatory neuron stimulation at 5 Hz evoked  
33 robust hippocampal activity that propagates to the primary auditory cortex. We then tested 5Hz  
34 vHP stimulation paired with either natural vocalizations or artificial/noise acoustic stimuli. vHP  
35 stimulation enhanced auditory responses to vocalizations (with a negative or positive valence) in  
36 the inferior colliculus, medial geniculate body, and auditory cortex, but not to their temporally  
37 reversed counterparts (artificial sounds) or broadband noise. Meanwhile, pharmacological vHP  
38 inactivation diminished response selectivity to vocalizations. These results directly reveal the  
39 large-scale hippocampal participation in natural sound processing at early centers of the ascending  
40 auditory pathway. They expand our present understanding of hippocampus in global auditory  
41 networks.

## 42 **Introduction**

43 In the central auditory system, auditory input from the ear transmits to the inferior colliculus  
44 (IC), medial geniculate body (MGB) in thalamus, and auditory cortex (AC) along the ascending  
45 auditory pathway (1-3). Information is hierarchically relayed along this ascending pathway, as  
46 distinct auditory features like amplitude and frequency are gradually extracted and processed  
47 throughout each auditory center (3-7). Existing functional frameworks describing auditory  
48 processing in the ascending auditory pathway are often examined using basic stimuli such as pure  
49 tones and broadband noise (8-10). However, neural representation of simplified acoustic stimuli  
50 may not reliably predict responses to natural sounds (8, 11-13), such as vocalizations, which are  
51 critical for facilitating communications and behavioral responses (14-16). Natural sound  
52 processing requires decoding complex spectrotemporal dynamic properties (17, 18) and additional  
53 input from higher-order regions is needed to facilitate tacitly assumed auditory functions such as  
54 communication, learning, and memory processes (19-22). Despite the current consensus on the  
55 pivotal roles played by AC corticofugal projections in natural sound processing (7, 23-25),  
56 emerging structural evidence has revealed that auditory midbrain and thalamus project to non-  
57 auditory regions such as superior colliculus (26) and striatum (27), respectively, and receive  
58 afferents from sensory, prefrontal, and limbic regions (28, 29). These findings suggest that  
59 information can transmit in and out of early auditory centers in the ascending pathway to cortex  
60 and beyond, parallel with those at the AC level in the processing hierarchy. We speculate that the  
61 auditory network for natural sound processing is far more brain-wide than presently known.

62 Given its roles in memory, emotion, and learning functions (30-32), we contend that the  
63 hippocampus is a strong candidate to participate in brain-wide auditory processing of natural  
64 sounds. Notably, the hippocampus has been indirectly linked with auditory processing (33, 34).

65 Functional studies indicate interactions between the hippocampus and auditory cortex during  
66 learning and memory processes. Electrophysiology studies demonstrate that the hippocampus  
67 actively engages the auditory cortex to transform auditory inputs into long-term memories that are  
68 subsequently consolidated in cortical networks (35, 36). Meanwhile, studies show that specific  
69 hippocampal neurons only respond to sounds associated with a trained sound behavioral task (22,  
70 36), implying that the hippocampus participates in the interpretation of complex auditory inputs.  
71 Anatomically, the hippocampus can receive and relay auditory signals via reciprocal projections  
72 directly with AC (37, 38) and indirectly through parahippocampal regions (38, 39) and forebrain  
73 pathways (19, 40), such as the entorhinal cortex, amygdala and medial septum complex. Tracing  
74 studies also indicated indirect projections, albeit scarcer, from the hippocampus to the IC and MGB  
75 via parahippocampal regions and amygdala (28, 29, 41). However, existing studies have not  
76 directly examined the role of the hippocampus in processing auditory inputs at these early auditory  
77 centers. Further, most studies so far focus on the cortex. They provide little to no evidence of the  
78 possible functional interactions between the hippocampus and auditory regions at the midbrain  
79 and thalamic levels. At present, whether and how the hippocampus functionally influences  
80 auditory responses, especially in the early ascending auditory centers, remains unknown.

81 Here, we posit that the hippocampus participates in natural sound processing at early sound  
82 processing centers within the ascending auditory pathway, especially the IC and MGB. The ventral  
83 hippocampus (vHP) plays a role in processing sensory inputs with an emotional context (42, 43),  
84 thus it may influence natural sound processing throughout the ascending pathway. In this study,  
85 we examined whether optogenetically evoked vHP activity modulates sound processing in the  
86 auditory midbrain, thalamus and cortex. Using a combined optogenetic cell-specific stimulation  
87 of Ca<sup>2+</sup>/calmodulin-dependent protein kinase II $\alpha$  (CaMKII $\alpha$ )-expressing vHP neurons and whole-

88 brain functional MRI (fMRI) visualization, we assessed blood-oxygenation-level dependent  
89 (BOLD) fMRI responses to two different categories of sound – natural sound (i.e., vocalizations)  
90 and artificial/basic acoustic stimuli. We revealed that the vHP activity enhances auditory responses  
91 to vocalizations, but not artificial stimuli or noise, in the IC, MGB and AC.

92

## 93 **Results**

### 94 **Brain-wide propagation of neural activity initiated at ventral hippocampus**

95 We characterized the downstream targets of the ventral hippocampus (vHP) using optogenetics  
96 to selectively stimulate CaMKII $\alpha$ -expressing vHP excitatory neurons, primarily in the dentate  
97 gyrus of vHP. Anatomical MRI scans confirmed the location of the virus injection and optical fiber  
98 implantation in vHP of all animals (**Figure 1A**). Immunohistochemistry confirmed that CaMKII $\alpha$ <sup>+</sup>  
99 excitatory neurons of the vHP (**Figure 1B**), but not GABAergic inhibitory neurons, expressed  
100 ChR2-mCherry (**Supplementary Figure 1A**).

101 To examine frequency-dependent spatiotemporal characteristics of brain-wide, long-range  
102 evoked BOLD responses driven by vHP, we performed whole-brain optogenetic fMRI in lightly  
103 anesthetized rats. Blue light pulses at five frequencies (1 Hz with 10 % duty cycle, 5 Hz, 10 Hz,  
104 20 Hz, and 40 Hz with 30 % duty cycle; light intensity, 40 mW/mm<sup>2</sup>) were delivered to vHP  
105 neurons in a block design paradigm (**Supplementary Figure 2A**). We chose a reduced duty cycle  
106 for 1 Hz stimulation to avoid excessively long stimulation pulse width that may not be  
107 physiological. 5 Hz optogenetic stimulation of vHP evoked robust brain-wide positive BOLD  
108 activations in regions related to learning, memory, sensory processing and emotion, including  
109 bilateral vHP, dorsal hippocampus (dHP), entorhinal cortex (Ent), primary auditory cortex (AC),

110 perirhinal cortex (Prh), amygdala (AMG), medial septum (MS), lateral septum (LS), diagonal band  
111 of Broca (DBB), and cingulate cortex (Cg) (**Figure 2**). Note that we did not detect any positive  
112 BOLD activations in IC and MGB in midbrain and thalamus, respectively. Such brain-wide  
113 activations evoked by 5 Hz stimulation indicated a high possibility of sound processing modulation.  
114 Further, this frequency matches the previously reported range of hippocampal theta oscillations,  
115 which travels along the hippocampal septotemporal axis (44, 45). Importantly, we found robust  
116 BOLD activations in the AC only during 5 Hz stimulation at vHP, but not at the other four  
117 frequencies (1 Hz, 10 Hz, 20 Hz, 40 Hz) (**Supplementary Figure 2C**). These frequencies evoked  
118 weaker BOLD responses in Prh, MS, and LS, and Cg, while retaining strong BOLD responses in  
119 vHP and dHP. Altogether, these results demonstrate the most extensive brain-wide vHP  
120 downstream targets found at 5 Hz stimulation, especially the robust BOLD activations in AC.  
121 These findings indicate that 5 Hz vHP stimulation generates strong and robust hippocampal  
122 activity outputs to AC and other regions, likely modulating sound processing brain-wide.

123 **Hippocampal outputs enhance neural responses and their selectivity to vocalizations with**  
124 **negative valence in auditory midbrain, thalamus and cortex**

125 To explore the large-scale hippocampal modulatory effects on early auditory processing of  
126 natural sound, we performed auditory fMRI with and without continuous 5 Hz optogenetic  
127 stimulation at vHP. Forward aversive vocalizations (i.e., natural and behaviorally relevant) and the  
128 same but temporally reversed vocalizations (i.e., artificial and behaviorally irrelevant) were  
129 presented to the contralateral/left ear in a block-design paradigm (**Supplementary Figure 3A**). As  
130 expected, auditory evoked BOLD responses occurred along the ascending auditory pathway,  
131 including ipsilateral IC, MGB, and bilateral AC (**Figure 3**). Without optogenetic stimulation, the  
132 BOLD responses (as described by  $\beta$  values) in IC, MGB and AC were stronger using forward than

133 reversed vocalizations (with  $\beta$  percentage difference between forward and reversed vocalization  
134 responses in IC:  $8.6 \pm 2.7$  %,  $p < 0.01$ ; MGB:  $34.7 \pm 10.53$  %,  $p < 0.05$ ; AC:  $22.0 \pm 7.7$  %,  $p <$   
135  $0.05$ , paired Student's t-test followed by Holm-Bonferroni correction). This finding demonstrates  
136 the response selectivity to forward vocalizations, which is consistent with our prior findings in  
137 rodent auditory system (46). Here, the response selectivity was most prominent in the external  
138 cortex (ECIC) and dorsal cortex (DCIC) of IC (with  $\beta$  percentage difference in ECIC:  $8.8 \pm 2.6$  %,  $p <$   
139  $0.01$ ; DCIC:  $7.8 \pm 1.6$  %,  $p < 0.01$ , paired Student's t-test followed by Holm-Bonferroni  
140 correction).

141 Optogenetic 5 Hz vHP stimulation significantly enhanced response selectivity to forward  
142 vocalizations throughout the ascending auditory pathway (with the  $\beta$  percentage difference  
143 between forward and reversed vocalization responses in IC:  $16.3 \pm 3.5$  %,  $p < 0.01$ ; MGB:  $166.2$   
144  $\pm 57.6$  %,  $p < 0.01$ ; AC:  $46.5 \pm 11.9$  %,  $p < 0.001$ , paired Student's t-test followed by Holm-  
145 Bonferroni correction). Specifically, only the BOLD responses in IC, MGB and AC evoked by the  
146 forward vocalizations were significantly increased by optogenetic stimulation (with  $\beta$  percentage  
147 increase in forward vocalization response in IC:  $18.2 \pm 7.3$  %,  $p < 0.05$ ; MGB:  $76.5 \pm 22.6$  %,  $p <$   
148  $0.01$ ; AC:  $28.7 \pm 14.1$  %,  $p < 0.05$ , paired Student's t-test followed by Holm-Bonferroni correction).  
149 This finding demonstrates that the hippocampal outputs selectively modulate the responses to  
150 forward vocalizations that convey contextual information. Note that such increased responses in  
151 IC occurred in ECIC and DCIC, as well as CNIC (with  $\beta$  increase in ECIC:  $20.5 \pm 9.5$  %,  $p < 0.05$ ;  
152 DCIC:  $20.8 \pm 4.2$  %,  $p < 0.001$ , CNIC:  $26.3 \pm 6.1$  %,  $p < 0.01$ , paired Student's t-test followed by  
153 Holm-Bonferroni correction). Altogether our fMRI results indicate that hippocampal outputs  
154 (initiated by the 5 Hz vHP stimulation) can enhance IC, MGB and AC auditory responses and their

155 selectivity to natural and behaviorally relevant sounds at early processing centers within the  
156 ascending auditory pathway.

157 **Hippocampal outputs enhance neural responses and their selectivity to vocalizations with**  
158 **positive valence**

159 We then utilized the same approach to examine whether such hippocampal modulation on  
160 natural sound processing was biased for only the aversive content in vocalizations. So, we  
161 performed auditory fMRI with postejaculatory vocalizations with and without presenting the 5 Hz  
162 optogenetic stimulation at vHP. Similarly, auditory evoked BOLD responses occurred along the  
163 ascending auditory pathway, including IC, MGB, and AC (**Figure 4**). Without optogenetic  
164 stimulation, the BOLD responses evoked by postejaculatory vocalizations also showed response  
165 selectivity to the forward one (with  $\beta$  percentage difference between forward and reversed  
166 vocalization responses in IC:  $7.8 \pm 1.7$  %,  $p < 0.001$ ; MGB:  $43.0 \pm 16.2$  %,  $p < 0.05$ ; AC:  $40.5 \pm$   
167  $14.4$  %,  $p < 0.05$ , paired Student's t-test followed by Holm-Bonferroni correction). Consistent with  
168 the results of aversive vocalization experiment, the response selectivity to forward postejaculatory  
169 vocalizations in IC was mainly observed in ECIC and DCIC (with  $\beta$  percentage difference in ECIC:  
170  $5.4 \pm 1.8$  %,  $p < 0.01$ ; DCIC:  $6.5 \pm 2.5$  %,  $p < 0.05$ , paired Student's t-test followed by Holm-  
171 Bonferroni correction), but not CNIC (no significant difference).

172 During optogenetic stimulation, similar to the aversive vocalization experiment, the response  
173 selectivity to the forward postejaculatory vocalizations was significantly enhanced throughout the  
174 ascending auditory pathway (with the  $\beta$  percentage difference between forward and reversed  
175 vocalization responses in IC:  $19.2 \pm 3.5$  %,  $p < 0.001$ ; MGB:  $118.1 \pm 43.0$  %,  $p < 0.01$ ; AC:  $84.7$   
176  $\pm 23.2$  %,  $p < 0.001$ , paired Student's t-test followed by Holm-Bonferroni correction). Specifically,



177 such enhancement primarily arose from increased responses to forward vocalizations (with  $\beta$   
178 percentage increase in forward vocalization response in IC:  $15.2 \pm 4.8$  %,  $p < 0.01$ , MGB:  $123.1$   
179  $\pm 36.6$ %,  $p < 0.01$ ; AC:  $74.7 \pm 34.2$  %,  $p < 0.05$ , paired Student's t-test followed by Holm-  
180 Bonferroni correction). In IC, such increased responses were found in ECIC, DCIC as well as  
181 CNIC (with  $\beta$  increase in ECIC:  $16.0 \pm 6.3$  %,  $p < 0.05$ ; DCIC:  $9.8 \pm 3.0$  %,  $p < 0.01$ ; CNIC:  $17.3$   
182  $\pm 4.3$  %,  $p < 0.01$ , paired Student's t-test followed by Holm-Bonferroni correction). Taken together,  
183 these results demonstrate that the hippocampus plays a key role in modulating natural vocalization  
184 processing. Such hippocampal modulatory effects are not biased towards the aversive content  
185 embedded in the vocalizations. These fMRI findings again show that, for behaviorally relevant  
186 sound, the hippocampal outputs triggered by the 5 Hz vHP stimulation enhance auditory  
187 processing at large scale throughout the early ascending auditory pathway.

#### 188 **Hippocampal outputs do not modulate neural responses to broadband acoustic noise**

189 To further investigate whether the modulatory effects of hippocampal outputs are only specific  
190 to auditory processing of natural sounds, we replaced the vocalizations with a basic acoustic  
191 stimulus, 1 – 40 kHz broadband noise (**Supplementary Figure 4**). As expected, the broadband  
192 noise evoked BOLD responses along the ascending auditory pathway, including IC, MGB, and  
193 AC. Importantly, the noise evoked BOLD responses in IC, MGB, and AC remained unchanged  
194 during the vHP stimulation (**Figure 5**). This finding reveals that the hippocampal outputs do not  
195 modulate behaviorally irrelevant or basic acoustic stimuli.

196 **Pharmacological hippocampal inactivation alters auditory responses and their selectivity for**  
197 **vocalizations**

198 In addition, we examined the effects of pharmacologically inactivating neurons in the dentate  
199 gyrus of vHP on natural sound processing using tetrodotoxin (TTX). Auditory fMRI was  
200 performed before (PRE) and after (POST) infusion of TTX at vHP (**Supplementary Figure 5**).  
201 As expected, before the TTX infusion, the BOLD responses evoked by aversive vocalizations  
202 showed response selectivity to the forward one (**Figure 6**) (with  $\beta$  percentage difference between  
203 forward and reversed vocalization responses in IC:  $15.6 \pm 1.9$  %,  $p < 0.01$ ; MGB:  $77.6 \pm 23.5$  %,  $p < 0.05$ ; AC:  $132.2 \pm 60.5$  %,  $p < 0.05$ , paired Student's t-test followed by Holm-Bonferroni  
204 correction). Similarly, the response selectivity to forward aversive vocalizations in IC was mainly  
205 observed in ECIC and DCIC (with  $\beta$  percentage difference in ECIC:  $11.2 \pm 4.1$  %,  $p < 0.05$ ; DCIC:  
206  $31.4 \pm 8.8$  %,  $p < 0.05$ , paired Student's t-test followed by Holm-Bonferroni correction), but not  
207 in CNIC.

209 Notably, pharmacological vHP inactivation via TTX infusion abolished the response selectivity  
210 to forward aversive vocalizations throughout the ascending auditory pathway, including IC, MGB,  
211 and AC. In general, the BOLD responses to forward and reversed vocalizations were also reduced.  
212 Yet the BOLD responses to forward vocalizations were diminished by a much greater extent (with  
213  $\beta$  percentage decrease in forward vocalization response in IC:  $-20.6 \pm 3.9$  %,  $p < 0.01$ ; MGB: -  
214  $54.4 \pm 21.5$  %,  $p < 0.05$ ; AC:  $-44.9 \pm 17.0$  %,  $p < 0.05$ , paired Student's t-test followed by Holm-  
215 Bonferroni correction). In IC, such decreased responses were mainly found in ECIC and DCIC  
216 (with  $\beta$  percentage decrease in ECIC:  $-12.9 \pm 3.9$  %,  $p < 0.05$ ; DCIC:  $-18.3 \pm 3.6$  %,  $p < 0.01$ ,  
217 paired Student's t-test followed by Holm-Bonferroni correction), but not in CNIC. These findings  
218 present additional evidence that vHP modulates and shapes IC, MGB and AC response selectivity

219 to behaviorally relevant sounds at early sound processing centers within the ascending auditory  
220 pathway.

221

## 222 **Discussion**

223 Here, we experimentally revealed the large-scale modulatory effects of ventral hippocampal  
224 outputs on early sound processing within the ascending auditory pathway by monitoring auditory  
225 responses during optogenetic vHP stimulation or pharmacological inactivation using large-view  
226 fMRI. We discovered a robust hippocampal influence on BOLD responses to vocalizations, but  
227 not artificial/basic acoustic stimuli, in the auditory midbrain, thalamus, and cortex. These fMRI  
228 results directly support the large-scale and facilitatory influence of the hippocampus on natural  
229 sound processing in early auditory centers within the ascending auditory pathway.

### 230 **Pathways subserving hippocampal top-down modulation of natural sound processing in** 231 **early auditory centers**

232 In the classical view, the auditory cortex processes complex auditory features and provides  
233 corticofugal feedback to modulate the responses in IC and MGB (4, 19-22). In particular, the  
234 existing hierarchical notion of cortical processing (48-50) postulates that the AC decodes the  
235 spectrotemporal dynamic features of auditory inputs, which facilitate responses to complex natural  
236 acoustic stimuli like vocalizations (5). However, studies suggest that complex sound processing  
237 may also occur at early auditory centers (51, 52). Converging evidence indicates that extraction  
238 and processing of spectral and temporal features begin at the midbrain level for discriminating  
239 natural sounds (53, 54), such as vocalizations (46, 55, 56). Moreover, an electrophysiological study  
240 showed that IC and MGB represent more comprehensive stimulus identities of natural stimuli

241 relative to the cortex (4), highlighting the importance of early auditory structures in processing  
242 natural sounds. In addition, recent discoveries of non-canonical regions in processing complex  
243 auditory stimuli, such as entorhinal cortex (Ent) and medial septum (MS) (19, 20), and inevitably  
244 the hippocampus due to the dense reciprocal axonal projections (39, 57), challenge current dogma  
245 on the hierarchical notion of cortical processing. Here, we directly demonstrated that the  
246 hippocampus, a limbic region vital for learning and memory functions, modulates auditory  
247 responses to natural sounds along the early ascending auditory pathway. We propose that the  
248 hippocampus acts as a network hub that receives extensive projections from both subcortical and  
249 cortical regions (38, 58). In this view, multiple complementary pathways likely subserve long-  
250 range hippocampal modulation of central auditory processing of natural sound processing (**Figure**  
251 **7**).

252 At the midbrain level, the IC integrates ascending auditory inputs from the lower auditory  
253 structures and descending feedback signals from the auditory thalamus and cortex (3). Despite the  
254 descending feedback from AC (24, 25), the IC also receives direct inputs from non-auditory  
255 structures such as the amygdala (AMG) (29), a limbic region that interacts with the hippocampus  
256 to regulate emotional memory (59, 60). The direct projection from AMG to IC may provide rapid  
257 feedback for processing emotional auditory stimuli (61). Such AMG-IC projections provide a route  
258 for vHP to modulate the responsiveness of IC neurons to specific types of stimuli based on the  
259 behavioral relevance and emotional valence (29, 61). Meanwhile, a recent retrograde tracing study  
260 revealed that IC receives descending projections from non-auditory regions, such as the entorhinal  
261 (Ent), perirhinal (Prh), and cingulate (Cg) cortices (28). These regions are part of the hippocampal  
262 formation and are linked with learning, memory, and sensory processes (31, 38, 62, 63). For  
263 instance, the hippocampal-entorhinal circuit can acquire and discriminate frequency and temporal

264 features of auditory cues associated with reward-related behavior (20). Meanwhile, Prh inputs are  
265 required for fear conditioning to complex stimuli, such as vocalizations, but not for continuous  
266 tones (64, 65). Furthermore, the hippocampus also interacts with Cg to support memory encoding  
267 and retrieval of context-dependent information, thus facilitating the corresponding processing of  
268 behaviorally relevant stimuli (62, 63). Meanwhile, we found that our identified regions (AMG,  
269 Ent, Prh and Cg) were prominently activated upon 5 Hz optogenetic stimulation (**Figure 2**).  
270 Together, multiple afferents from non-auditory regions to IC suggest that inputs from higher-order  
271 structures, such as the vHP and its associated hippocampal formation, are vital for natural sound  
272 processing at the midbrain level.

273 At the thalamic level in the auditory hierarchy (66, 67), MGB can also receive hippocampal  
274 modulatory outputs via other sensory and prefrontal cortices, including somatosensory and  
275 cingulate cortices. For example, hind paw stimulation provides somatosensory inputs that can  
276 modulate auditory responses in the MGB (68), and electrical stimulation at the prefrontal cortex  
277 can influence spontaneous firing in the MGB (71). Meanwhile, MGB can also receive indirect  
278 inputs from the AMG via the thalamic reticular nucleus (TRN), which is critical for deviant sound  
279 detection (72). Exciting AMG-TRN projections amplified the sound-evoked responses in the  
280 auditory thalamus and, in turn, the cortex (73). Inactivating the basal AMG reduced certain  
281 conditioned responses to sound in MGB (74). Hence, the amplified sound-evoked response in  
282 MGB observed here can undergo modulation by hippocampal outputs via AMG and the prefrontal  
283 cortices such as cingulate.

284 At the cortical level, the auditory association area can receive hippocampal outputs directly  
285 from ventral CA1 neurons (41) and indirectly via the Ent, Prh, and parahippocampal cortices (75).  
286 Previous works have identified the functional roles of these hippocampal-cortical pathways

287 comprising auditory recognition (20, 76, 77) and auditory-related memory processes (33, 36).  
288 Hippocampal modulatory outputs could potentially reach the auditory cortex through  
289 hippocampal-cortical pathways (37), and subsequently also modulate sound responses in the  
290 midbrain and thalamus via corticofugal projections (7, 23).

291 Recent evidence indicates that the reticular limbic auditory pathway may provide a fast route  
292 to relay auditory inputs from the cochlear nucleus to high-order regions (19), suggesting that the  
293 hippocampus receives and processes behaviorally relevant auditory inputs via Ent and MS. Further,  
294 our histological findings showed strong anterograde Chr2 mCherry expression in the MS and  
295 lateral septum (LS), as well as the diagonal band of Broca (DBB) (**Supplementary Figure 1B**),  
296 suggesting a circuit loop that is dedicated for auditory processing outside of the central pathways.  
297 These regions support learning (78) and memory functions (79), particularly related to auditory  
298 processes. For instance, MS inactivation impairs acquiring auditory fear memory (22). MS and  
299 DBB are the primary sources of cholinergic projections to HP and AMG (80), which can be critical  
300 for contextual memory formation (81), sensory cue detection and discrimination (82, 83).  
301 Disrupting MS and DBB cholinergic projections to vHP prevents auditory fear memory acquisition  
302 and retention (84). Further, a prior study showed that systemic blockade of cholinergic signaling  
303 via atropine, a muscarinic acetylcholine receptor antagonist, inhibited response selectivity to  
304 vocalizations in the auditory midbrain (46). Here, robust activations in the septum complex (i.e.,  
305 MS, LS, and DBB) initiated from vHP (**Figure 2**) may trigger rapid downstream signaling  
306 cascades in the cholinergic system (82) and evoke postsynaptic responses at the terminal fields  
307 (85), such as the AMG. Cholinergic signaling within AMG is crucial for encoding and processing  
308 emotionally salient memories (86), which could facilitate selective amplification of auditory  
309 responses evoked by behaviorally relevant stimuli. Overall, we detected robust activations in

310 cortical (i.e., AC, Ent, Prh, Cg) and subcortical regions (i.e., AMG, MS, LS, DBB) during 5 Hz  
311 optogenetic stimulation at vHP (**Figure 2**). The hippocampal modulatory outputs evoked from  
312 vHP could propagate and functionally interact with these activated regions, thereby modulating  
313 auditory responses at early auditory centers within the ascending auditory pathway, particularly at  
314 the midbrain and thalamic levels.

### 315 **Hippocampal outputs enhance natural sound responses at early auditory centers**

316 In this study, we revealed that optogenetic activation of vHP, a region often associated with  
317 motivation or emotional behaviors (42, 43), enhanced auditory responses in early ascending  
318 auditory processing centers (i.e., IC, MGB) and the AC to forward, but not temporally reversed,  
319 vocalizations. Pharmacological inactivation of vHP diminished the auditory responses to forward  
320 vocalizations. Further, such hippocampal modulatory effects were absent when processing  
321 broadband noise, confirming that hippocampal activity is an integral component of natural sound  
322 processing within the ascending auditory pathway. Our findings demonstrate that the hippocampus  
323 is key for processing vocalizations and shaping the corresponding response selectivity.

324 The exact mechanisms underlying our experimentally observed selective modulation of natural  
325 sound processing by optogenetically triggered hippocampal outputs requires further investigation.  
326 We posit that specific spectrotemporal information embedded in the sound drive this specificity.  
327 The hippocampus is positioned to process temporal information of sensory inputs (33, 93), as  
328 hippocampal lesions can impair memory for the temporal order of events in both animals (94, 95)  
329 and humans (96, 97). When learning to associate specific time intervals with a given stimulus, the  
330 hippocampus is essential for discriminating minute temporal differences in rodents (98). These  
331 findings indicate that the hippocampus plays a critical role in encoding and recognizing temporal

332 information to subsequently discriminate and interpret the temporal organization of incoming  
333 sensory inputs.

334 Here, we observed that hippocampal modulation primarily facilitates auditory responses in IC,  
335 MGB, and AC to both types of vocalizations (i.e., aversive/fear and postejaculatory/positive), but  
336 not their temporally reversed counterparts (**Figures 3** and **4**). We postulate that temporally  
337 reversing vocalizations alter specific properties. Reversed vocalizations no longer carry the critical  
338 information embedded in forward vocalizations, which diminishes the behavioral relevance of the  
339 sound. The hippocampus, by interpreting and discriminating the embedded spectrotemporal  
340 features of the incoming sounds, can discriminate and recognize natural and/or behaviorally  
341 relevant stimuli by contextual memory recall according to past experience (99, 100) and then can  
342 exert selective influence to downstream targets. Moreover, blocking hippocampal outputs through  
343 pharmacological manipulation altered responses to forward vocalizations, and consequently  
344 disrupted the response selectivity to vocalizations (**Figure 6**). Together, our results showed that  
345 hippocampal outputs are critical to facilitate auditory responses to natural sounds.

346 Hippocampal modulatory outputs, such as the increased coherence of neuronal firing with  
347 theta/gamma oscillations (101) and/or modifying synaptic strengths (102), can promote  
348 communication between the hippocampus and its downstream targets, and then facilitate natural  
349 sound processing via multiple pathways. At a systems level, theta oscillations can correspond to  
350 contextual memory recall (i.e., retrieval of contextual information pertaining to a specific event in  
351 the past where its temporal context or sequence is important) (103-105). During memory retrieval,  
352 theta oscillations coupled with gamma oscillations were enhanced when processing previously  
353 learned, behaviorally relevant stimuli (106). We speculate that optogenetically initiated  
354 hippocampal outputs generate theta-like oscillations in the hippocampal-cortical network (44, 45)



355 to enhance retrieval processes between the hippocampus and Ent during auditory processing.  
356 Previous studies also demonstrated the importance of hippocampal and cortical theta oscillations  
357 (101, 107) in coordinating groups of neurons to integrate sensory information (108). Theta  
358 oscillations are essential to coordinate brain-wide activity (109), such that neuronal spiking in  
359 somatosensory (110), prefrontal (111) and entorhinal cortices (112) are phase-locked to  
360 hippocampal theta oscillations. These studies indicate that the hippocampus can influence distal  
361 sensory responses via theta oscillations.

362 In this study, we uncovered long-range hippocampal modulation of natural sound processing  
363 within the ascending auditory pathway during 5 Hz optogenetic stimulation at vHP. This  
364 stimulation frequency coincides with the reported range of hippocampal theta oscillations (101,  
365 107), evoked the most robust brain-wide activations, including in primary AC. Such theta-like  
366 activities could trigger the propagation of hippocampal activity to distal regions, facilitating the  
367 interaction with neural activity in the ascending auditory pathway (i.e., AC, MGB and IC) and  
368 other targets to produce modulatory effects. However, we do not preclude the potential modulatory  
369 effects of other stimulation frequencies in the range of theta oscillations like 10 Hz (101, 107).  
370 Even though BOLD activations evoked by 10 Hz optogenetic stimulation were not as widespread  
371 as 5 Hz, we still observed robust activations in subcortical regions (e.g., AMG, MS, LS, DBB)  
372 albeit with weaker activations in cortical regions (e.g., AC, Prh, Cg) (**Supplementary Figure 2**).  
373 Overall, our findings suggest that hippocampal top-down modulatory outputs, which may be  
374 triggered by behaviourally relevant auditory inputs, were augmented by optogenetic stimulation  
375 of vHP to enhance responses to natural sounds.

376 In summary, the present fMRI study established a top-down and large-scale modulatory role  
377 for the hippocampus throughout the ascending auditory pathway, including the auditory midbrain,

378 thalamus and cortex, to facilitate natural sound processing. Our findings expand our present  
379 understanding of central auditory system beyond the traditional cortex centric views. Future  
380 studies should elucidate the precise hippocampal modulatory processes of natural sound that arise  
381 from the brain-wide auditory information processing networks.

## 382 **Methods**

### 383 **Subjects**

384 Adult male Sprague-Dawley rats were used in all experiments. Animals were individually housed  
385 under a 12-h light/dark cycle with access to food and water ad libitum. All animal experiments  
386 were approved by the Committee on the Use of Live Animals in Teaching and Research of the  
387 University of Hong Kong. Group I underwent optogenetic fMRI experiments (n = 10), group II  
388 underwent combined optogenetics and auditory fMRI experiments (n = 11, aversive vocalizations  
389 experiments; n = 10, postejaculatory vocalizations experiments; n = 8, broadband noise  
390 experiments), and group III underwent combined pharmacological and auditory fMRI experiments  
391 (n = 7, aversive vocalizations experiments). Full details of animal surgical procedures, optogenetic  
392 stimulation paradigms, combined optogenetics, and auditory fMRI acquisition and analysis  
393 procedures, and histology are provided in SI Methods.

394

### 395 **Data and Code Availability**

396 The data files that support the findings of this study and computer codes used are available on  
397 Dryad Digital repository (<https://doi.org/10.5061/dryad.08kpr52x>).

398

### 399 **Acknowledgments**

400 This work was supported by Hong Kong Research Grant Council (C7048-16G and HKU17112120  
401 to E.X. Wu, and HKU17103819 and HKU17104020 to A.T.L. Leong), Lam Woo Foundation,  
402 Guangdong Key Technologies for Treatment of Brain Disorders (2018B030332001) and

403 Guangdong Key Technologies for Alzheimer's Disease Diagnostic and Treatment  
404 (2018B030336001) to E.X. Wu. We would like to thank Profs. J. He and G. Buzsáki for the  
405 insightful scientific discussions. We also thank Drs. R. Chan, C. Dong, A. To, and M. Bialy for  
406 their technical assistance. We also thank Dr. K. Deisseroth who provided us with the ChR2 viral  
407 construct.

408

#### 409 **Competing Financial Interests**

410 The authors declare no competing financial interests.

## 411 Figures

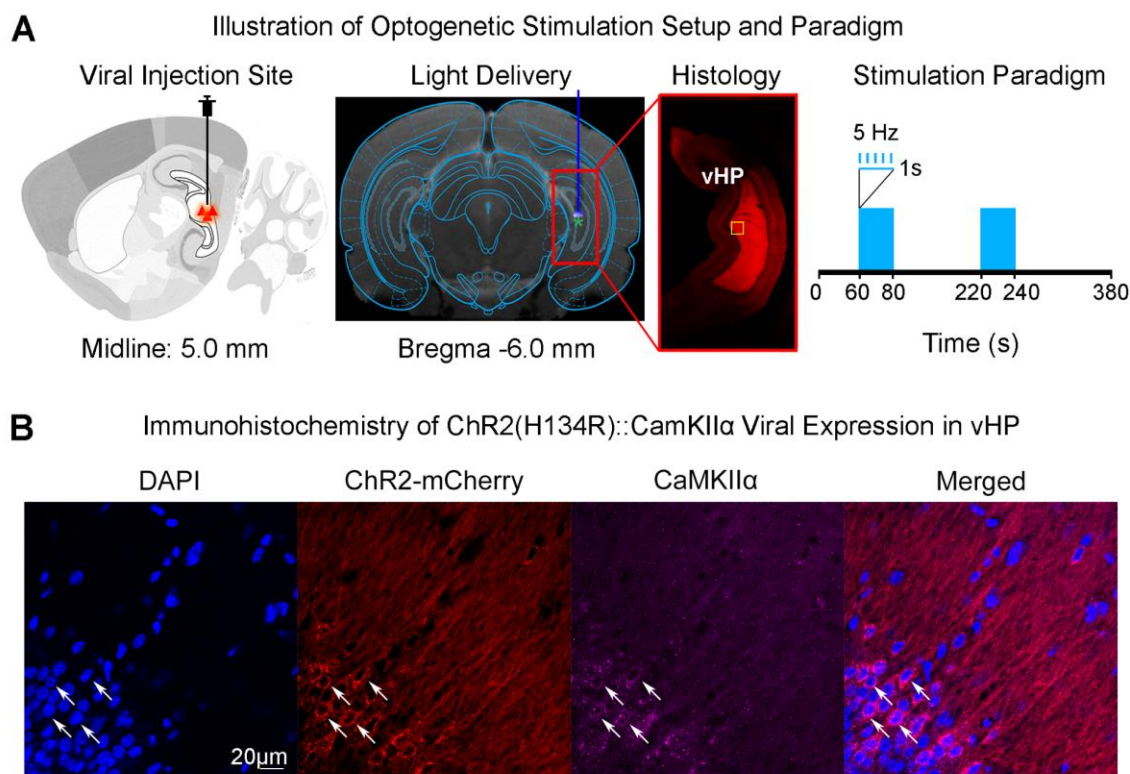

412  
413 **Figure 1. Experimental setup for optogenetic stimulation and histological characterization of**  
414 **ChR2::CaMKII viral expression in ventral hippocampus (vHP) excitatory neurons. (A)** Schematic  
415 (*Left*) and T2-weighted anatomical image (*Middle*) shows the viral injection and fiber implantation sites,  
416 respectively. Histology image shows viral expression in vHP (Red box). The yellow box indicates the  
417 location of magnified confocal images shown in *B*. Optogenetic fMRI stimulation paradigm (*Right*). 5 Hz  
418 was presented at 30 % duty cycle in a block-design paradigm (20 seconds ON; 140 seconds OFF). **(B)**  
419 Merged representative confocal images co-stained for the nuclear marker DAPI, ChR2-mCherry, and  
420 excitatory marker CaMKII $\alpha$  confirmed colocalization of ChR2-mCherry and CaMKII $\alpha$ <sup>+</sup> neurons of vHP  
421 (white arrows).

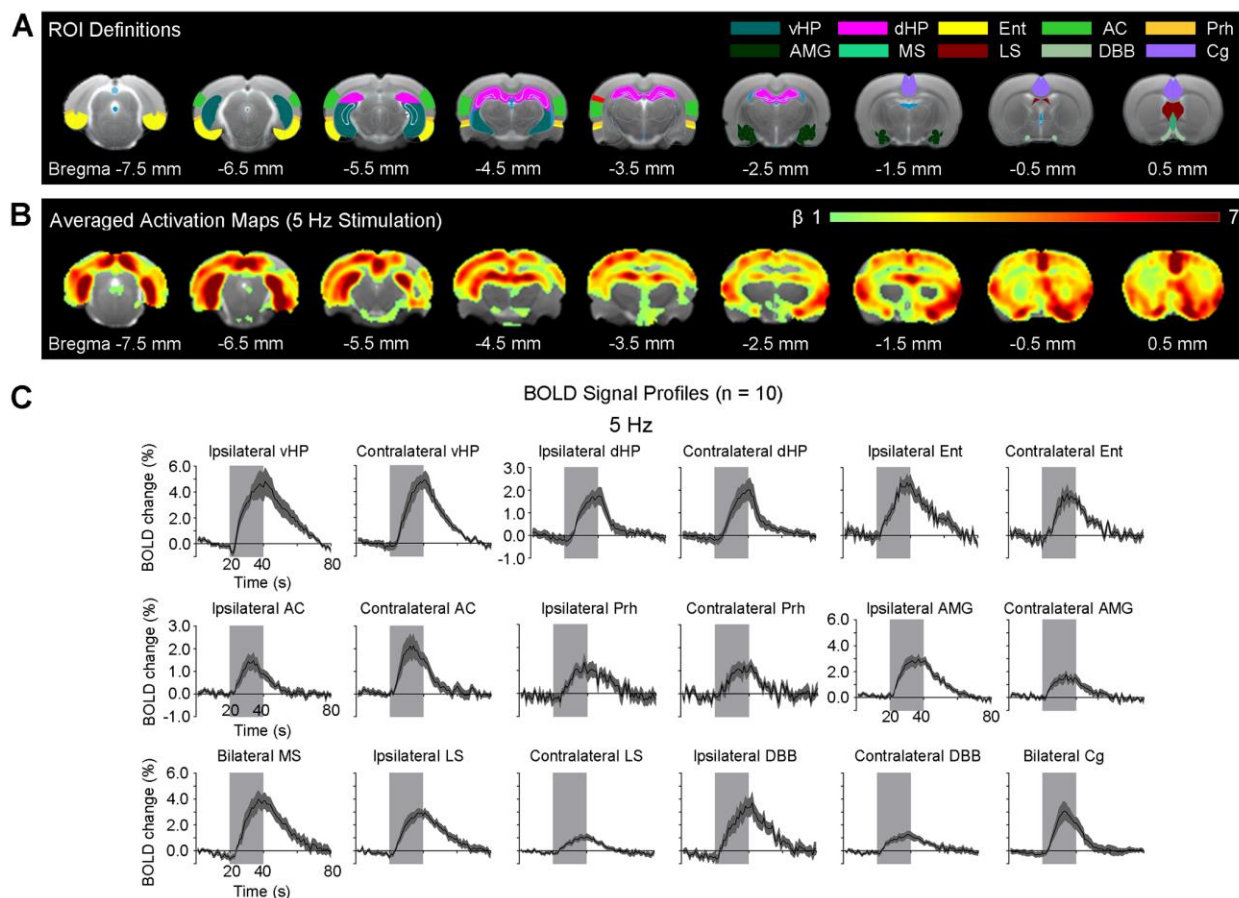

422

423 **Figure 2. Brain-wide activations detected in the hippocampal formation, and cortical and subcortical**  
 424 **regions during 5 Hz optogenetic stimulation of excitatory neurons in vHP. (A)** Regions of interest  
 425 (ROIs) defined by the rat brain atlas used to extract the BOLD signal profiles. **(B)** Averaged activation ( $\beta$ )  
 426 maps of optogenetic stimulation in vHP. Robust positive BOLD responses detected in bilateral vHP, dHP,  
 427 Ent, AC, Prh, AMG, MS, LS, DBB, and Cg during 5 Hz optogenetic stimulation ( $n = 10$ ;  $t > 3.1$ ;  
 428 corresponding to  $p < 0.001$ ). **(C)** BOLD signal profiles extracted from the ROIs. Error bars indicate  $\pm$  SEM.  
 429 The area shaded in grey indicates the 20 s 5 Hz optogenetic stimulation window. Abbreviations: Ventral  
 430 Hippocampus (vHP); Dorsal Hippocampus (dHP); Entorhinal Cortex (Ent); Auditory Cortex (AC);  
 431 Perirhinal Cortex (Prh); Amygdala (AMG); Medial Septum (MS); Lateral Septum (LS); Diagonal Band of  
 432 Broca (DBB); Cingulate Cortex (Cg).

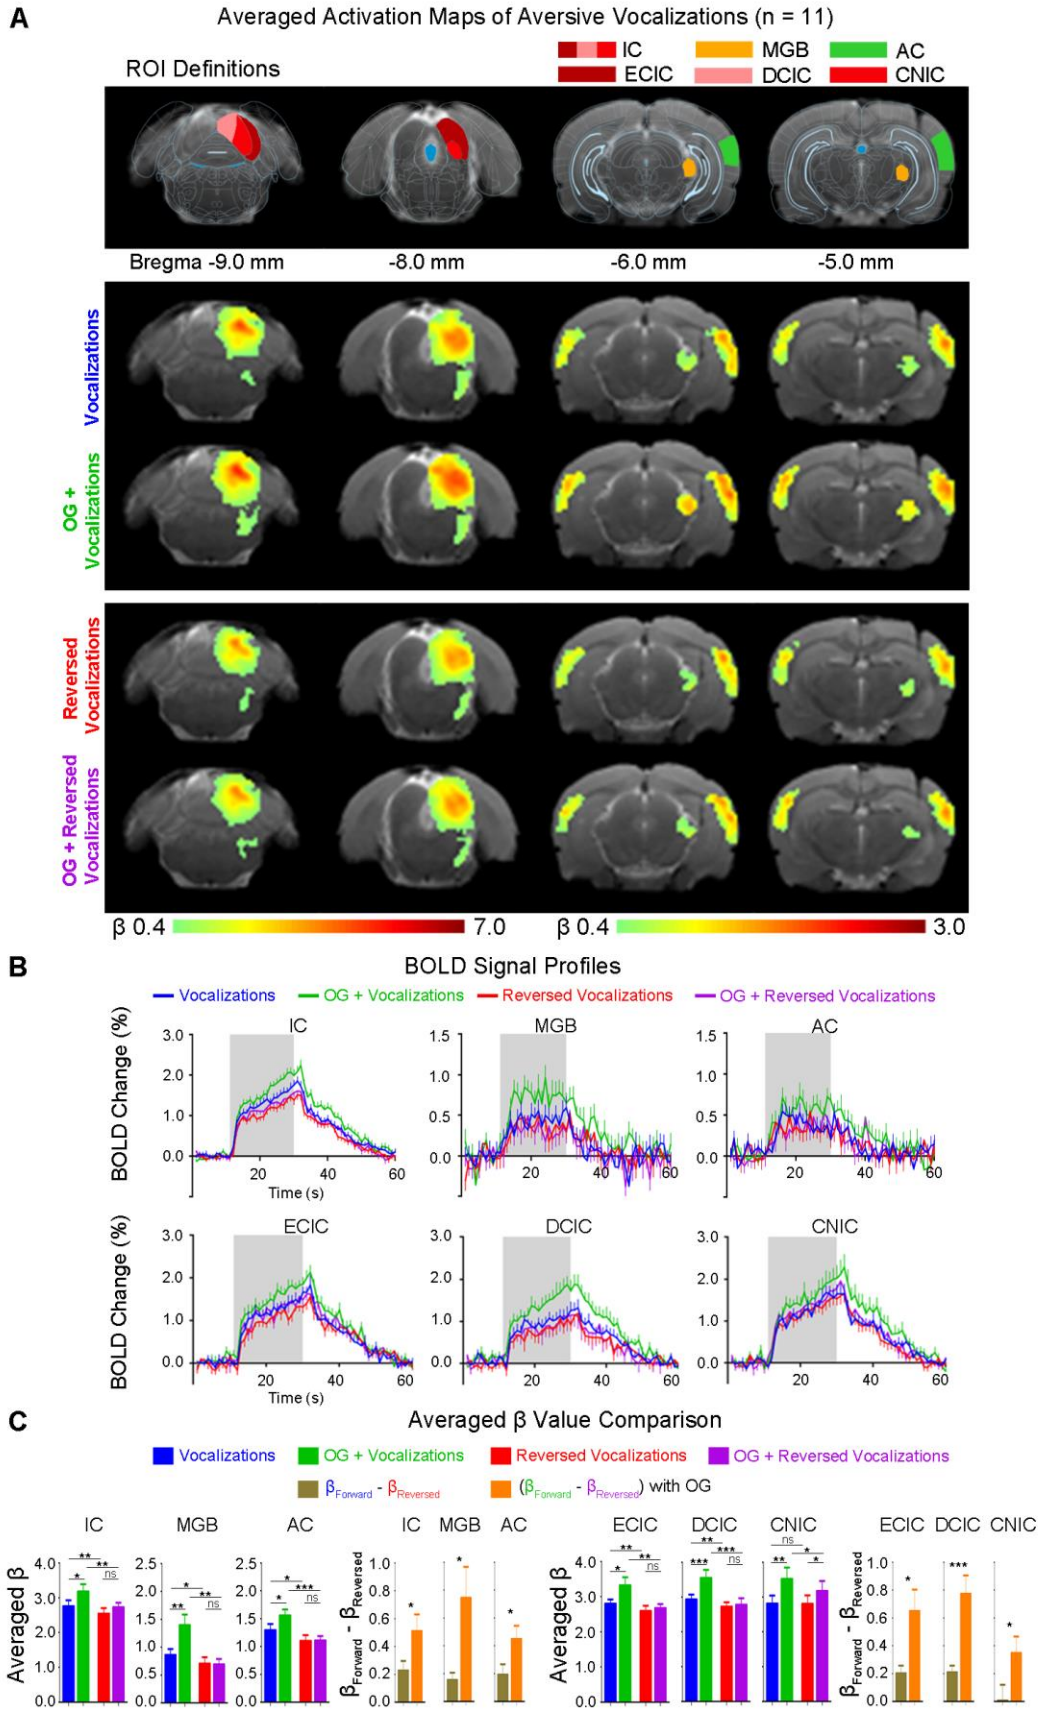

434 **Figure 3. vHP optogenetic stimulation enhances neural responses and their selectivity to aversive**  
435 **vocalizations in the auditory midbrain (inferior colliculus or IC), thalamus (medial geniculate body**  
436 **or MGB), and cortex (auditory cortex or AC). (A)** Illustration of the atlas-based region of interest (ROI)  
437 definitions (*Top*). Averaged BOLD activation ( $\beta$ ) maps with and without 5-Hz optogenetic stimulation  
438 generated by fitting a canonical hemodynamic response function (HRF) to individual voxels in the fMRI  
439 image ( $n = 11$ ;  $t > 2.6$ ; corresponding to  $p < 0.01$ ) (*Bottom*). **(B)** BOLD signal profiles extracted from the  
440 corresponding ROIs (IC, MGB, AC, ECIC, DCIC, and CNIC). Error bars indicate  $\pm$  SEM. The area shaded  
441 in grey indicates the 20 s acoustic stimulation. **(C)** BOLD signal (averaged  $\beta$ ) comparison showing the  
442 modulatory effects of optogenetic stimulation on responses to forward aversive vocalizations in IC, MGB,  
443 AC, ECIC, DCIC, and CNIC, but not temporally reversed counterparts (that are artificial and evoke no  
444 behavioral response). Statistical comparisons were performed using paired two-sample t-test followed by  
445 Holm-Bonferroni correction with \* for  $p < 0.05$ , \*\* for  $p < 0.01$ , \*\*\* for  $p < 0.001$ , and n.s. for not  
446 significant.



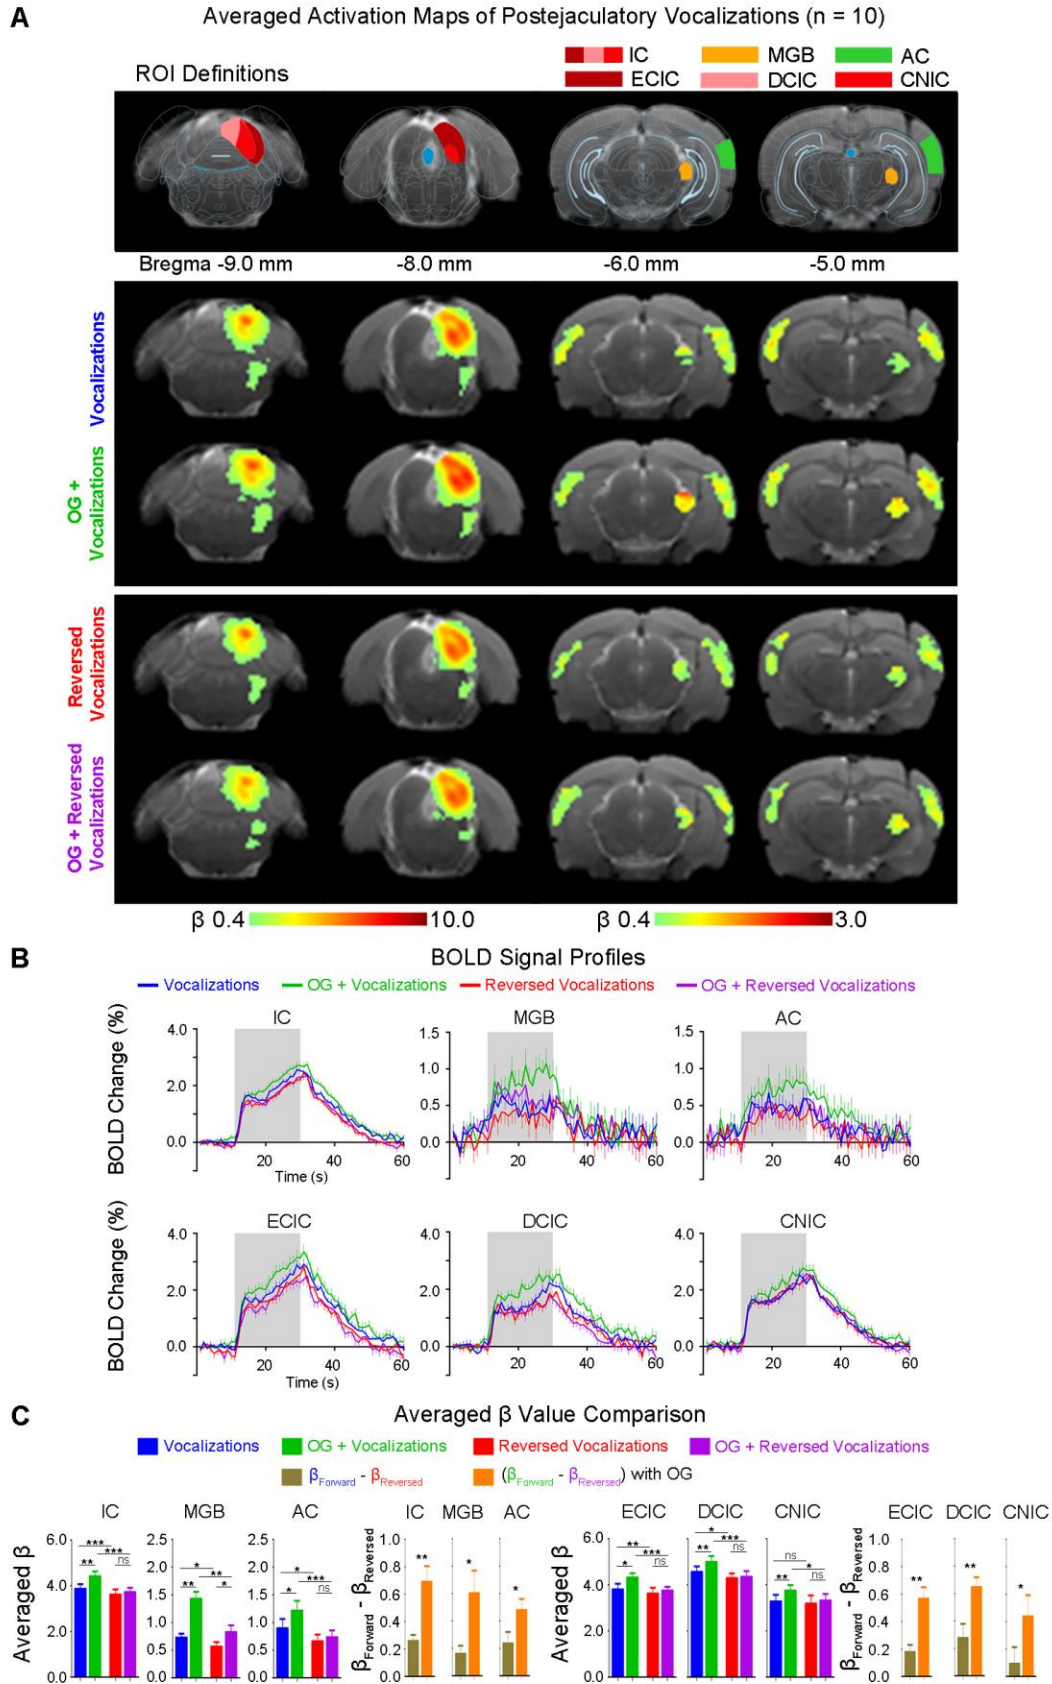

448 **Figure 4. vHP optogenetic stimulation enhances neural responses and their selectivity to**  
449 **postejaculatory vocalizations in the auditory midbrain (IC), thalamus (MGB), and cortex (AC). (A)**  
450 Illustration of the atlas-based region of interest (ROI) definitions (*Top*). Averaged BOLD activation ( $\beta$ )  
451 maps with and without 5-Hz optogenetic stimulation (*Bottom*) generated by fitting a canonical HRF to  
452 individual voxels in the fMRI image ( $n = 10$ ;  $t > 2.6$ ; corresponding to  $p < 0.01$ ). **(B)** BOLD signal profiles  
453 extracted from the corresponding ROIs (IC, MGB, AC, ECIC, DCIC, and CNIC). Error bars indicate  $\pm$   
454 SEM. The area shaded in grey indicates 20 s acoustic stimulation. **(C)** BOLD signal (averaged  $\beta$ )  
455 comparison showing the modulatory effects of optogenetic stimulation on responses to forward  
456 postejaculatory vocalizations in IC, MGB, AC, ECIC, DCIC, and CNIC, but not the temporally reversed  
457 counterparts. Statistical comparisons were performed using paired two-sample t-test followed by Holm-  
458 Bonferroni correction with \* for  $p < 0.05$ , \*\* for  $p < 0.01$ , \*\*\* for  $p < 0.001$ , and n.s. for not significant.

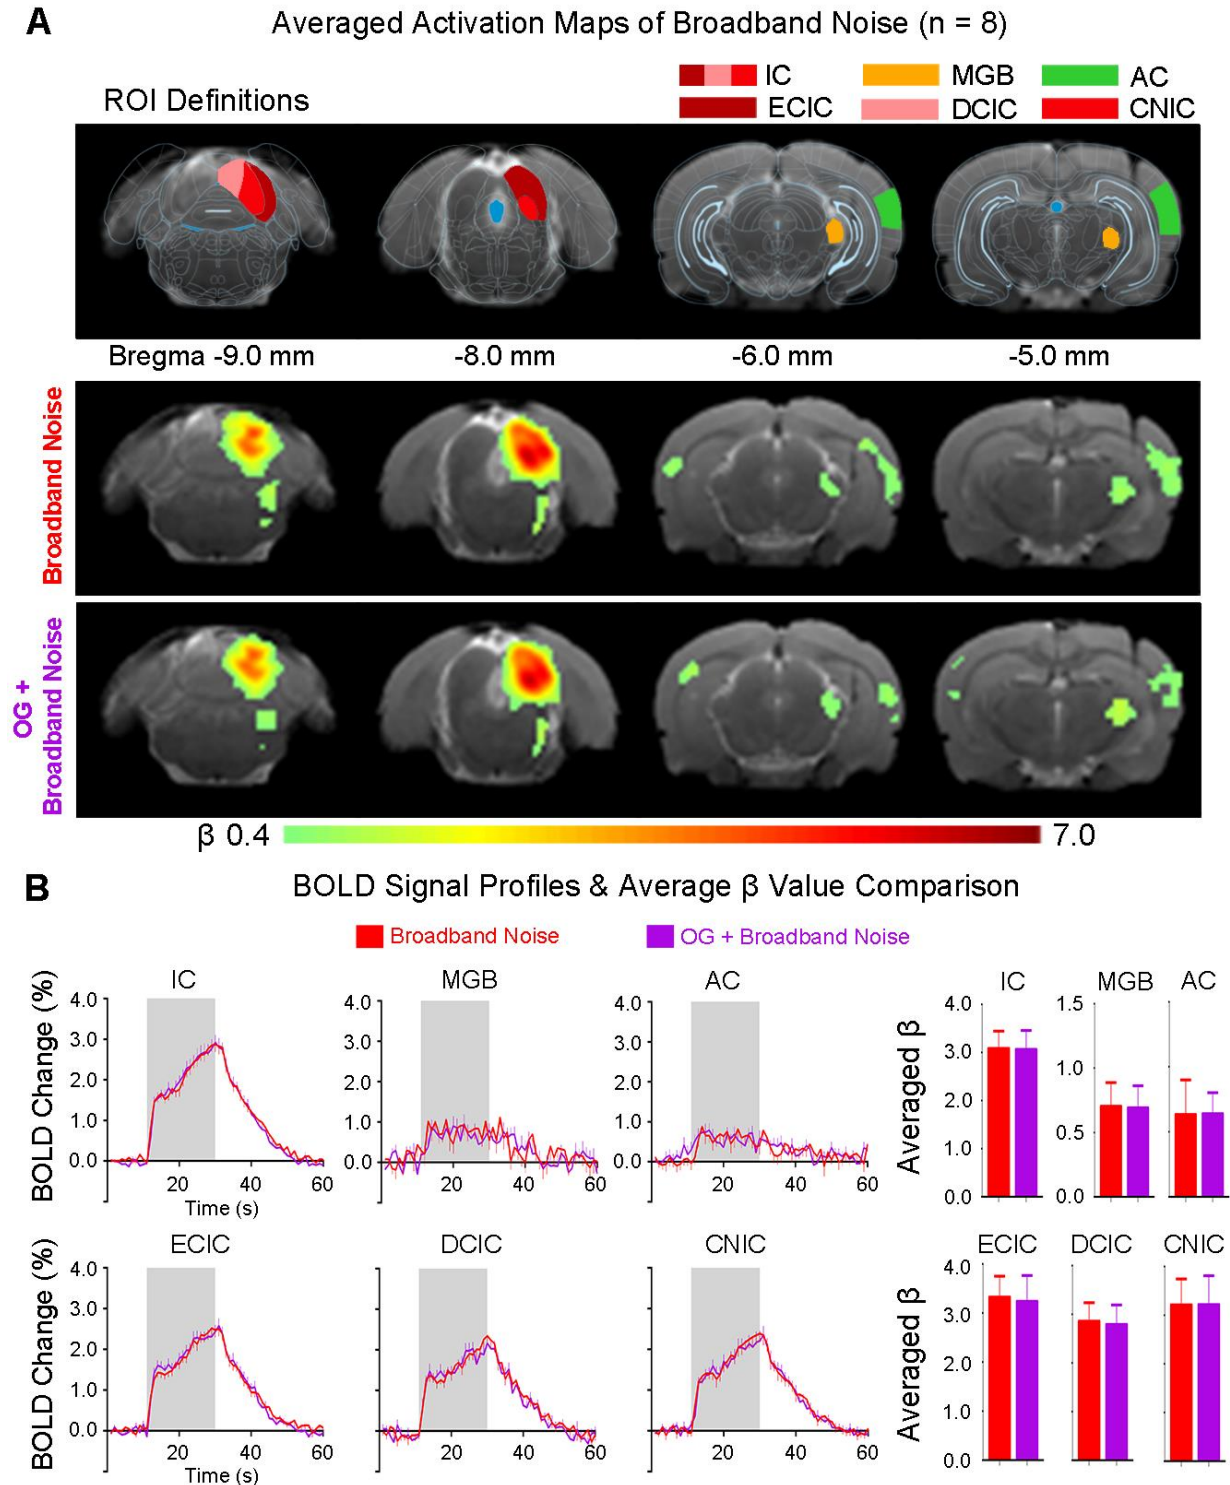

459

460 **Figure 5. vHP optogenetic stimulation shows no modulatory effects on the responses to broadband**

461 **acoustic noise in the auditory midbrain (IC), thalamus (MGB), and cortex (AC). (A)** Illustration of the

462 atlas-based region of interest (ROI) definitions (*Top*). Averaged BOLD activation ( $\beta$ ) maps with, without  
463 5-Hz optogenetic stimulation (*Bottom*) generated by fitting a canonical HRF to individual voxels in the  
464 fMRI image ( $n = 8$ ;  $t > 2.6$ ; corresponding to  $p < 0.01$ ). (**B**) BOLD signal profiles (*Left*) extracted from the  
465 corresponding ROIs (IC, MGB, AC, ECIC, DCIC, and CNIC). Error bars indicate  $\pm$  SEM. The area shaded  
466 in grey indicates the 20 s acoustic stimulation. BOLD signal (averaged  $\beta$ ) comparison (*Right*) showing no  
467 effects of optogenetic stimulation on broadband noise responses in IC, MGB, and AC. Statistical  
468 comparisons were performed using paired two-sample t-test followed by Holm-Bonferroni correction.

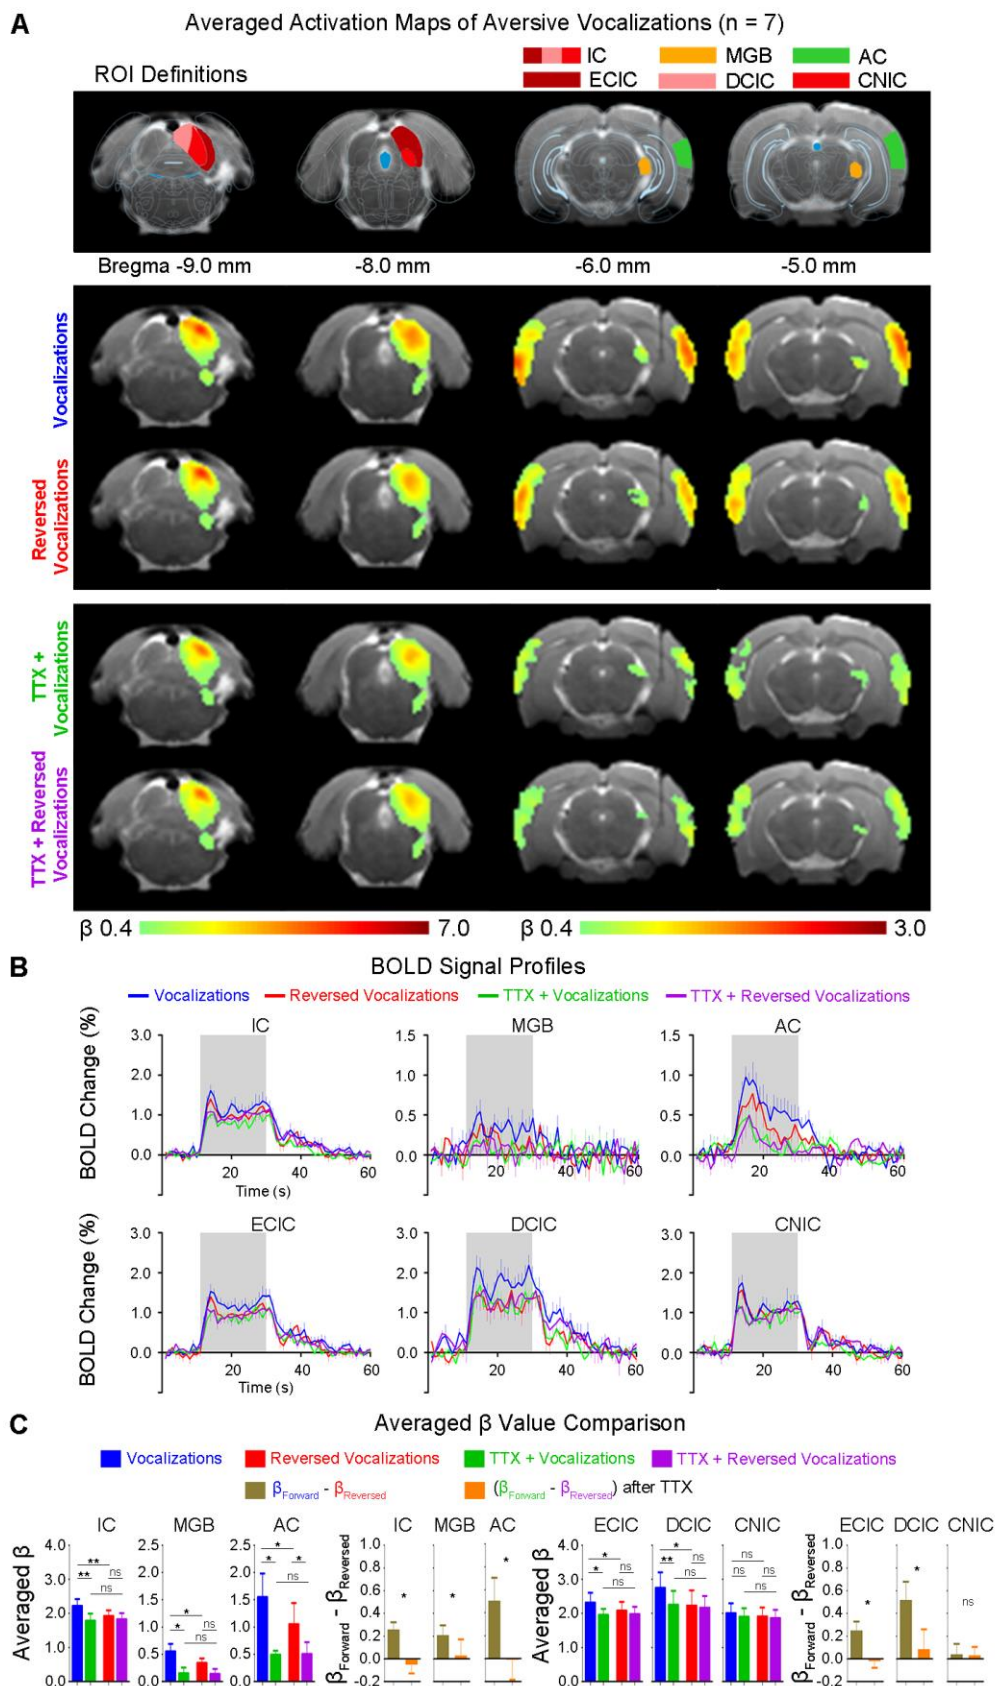

470 **Figure 6. Pharmacologically inactivating vHP alters neural responses and decreases their selectivity**  
471 **to aversive vocalizations in the auditory midbrain (IC), thalamus (MGB), and cortex (AC). (A)**  
472 Illustration of the atlas-based region of interest (ROI) definition (*Top*). Averaged BOLD activation ( $\beta$ ) maps  
473 before and after TTX infusion (*Bottom*) generated by fitting a canonical hemodynamic response function  
474 (HRF) to individual voxels in the fMRI image ( $n = 7$ ;  $t > 2.6$ ; corresponding to  $p < 0.01$ ). **(B)** BOLD signal  
475 profiles extracted from the corresponding ROIs (IC, MGB, AC, ECIC, DCIC, and CNIC). Error bars  
476 indicate  $\pm$  SEM. The area shaded in grey indicates 20 s acoustic stimulation. **(C)** BOLD signal (averaged  
477  $\beta$ ) comparison showing the effects of TTX inactivation of vHP neurons predominantly on responses to  
478 forward aversive vocalizations in IC, MGB, AC, ECIC, and DCIC. Statistical comparisons were performed  
479 using paired two-sample t-test followed by Holm-Bonferroni correction with \* for  $p < 0.05$ , \*\* for  $p < 0.01$ ,  
480 \*\*\* for  $p < 0.001$ , and n.s. for not significant.

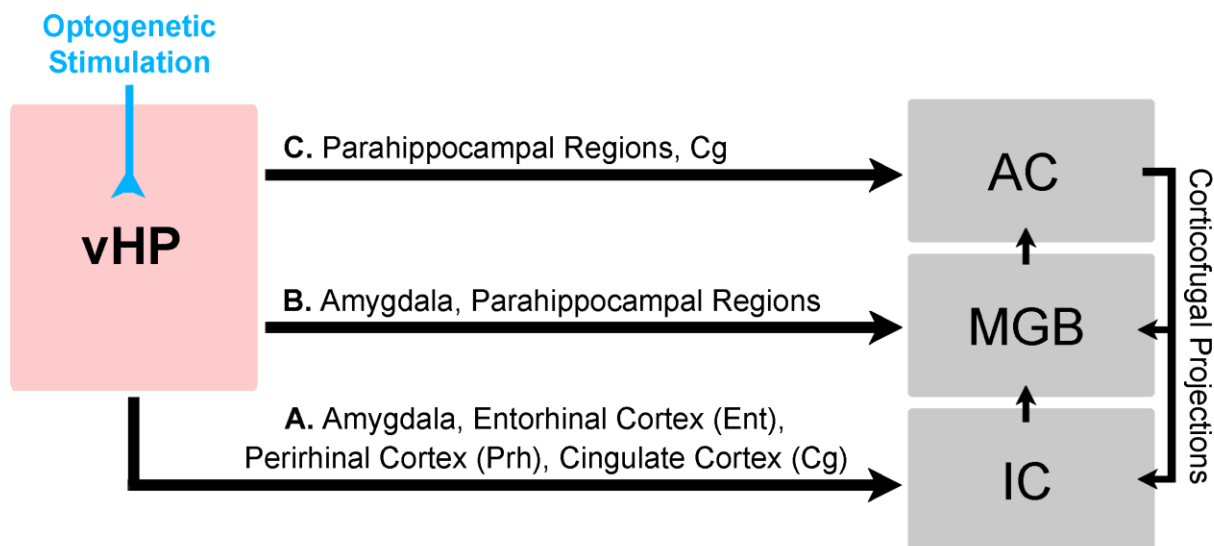

481  
482 **Figure 7. Schematic pathways of long-range hippocampal modulation of natural sound processing**  
483 **within the ascending auditory pathway through optogenetically-evoked vHP activity. *Route A:*** vHP  
484 could modulate responses in IC via indirect projections from amygdala, entorhinal cortex (Ent), perirhinal  
485 cortex (Prh) and cingulate cortex (Cg), which can then enhance the responses in MGB and AC along the  
486 ascending auditory pathway. ***Route B:*** vHP can modulate MGB responses indirectly via amygdala and  
487 parahippocampal regions, which could subsequently modulate responses in AC via ascending auditory  
488 pathway. ***Route C:*** vHP could modulate AC responses directly via hippocampal-cortical projections or  
489 indirectly via parahippocampal regions such as Ent, Prh, and Cg via cortico-cortical projections. AC could  
490 then modulate the responses in MGB and IC via corticofugal projections.

491

## SI Appendix

492

# **Hippocampus Modulates Natural Sound Processing at Early**

493

## **Auditory Centers**

494

Eddie C. Wong<sup>1,2</sup>, Xunda Wang<sup>1,2</sup>, Ed X. Wu<sup>1,2,3\*</sup>, Alex T. L. Leong<sup>1,2\*</sup>

495

496 <sup>1</sup>Laboratory of Biomedical Imaging and Signal Processing, The University of Hong Kong,  
497 Pokfulam, Hong Kong SAR, China

498 <sup>2</sup>Department of Electrical and Electronic Engineering, The University of Hong Kong, Pokfulam,  
499 Hong Kong SAR, China

500 <sup>3</sup>School of Biomedical Sciences, LKS Faculty of Medicine, The University of Hong Kong,  
501 Pokfulam, Hong Kong SAR, China

502

503

504

505

506

507 \*Correspondence should be addressed to Ed X. Wu, Ph.D. and Alex T. L. Leong, Ph.D.:

508 Laboratory of Biomedical Imaging and Signal Processing, Department of Electrical and Electronic  
509 Engineering, School of Biomedical Sciences and Department of Medicine, The University of Hong  
510 Kong, Pokfulam, Hong Kong, Hong Kong SAR, China.

511 Fax: +852-2859-8738.

512 Tel: +852-2859-7096.

513 Email: [ewu@eee.hku.hk](mailto:ewu@eee.hku.hk) & [tleon@eee.hku.hk](mailto:tleon@eee.hku.hk)



514 **SI Methods**

515 **Virus Packaging**

516 Channelrhodopsin2-mCherry fusion protein under the control of the Ca<sup>2+</sup> /calmodulin-  
517 dependent protein kinase II $\alpha$  (CaMKII $\alpha$ ) promoter was used. The AAV5-CaMKII $\alpha$ -  
518 ChR2(H134R)-mCherry plasmid (maps available online from  
519 [www.stanford.edu/group/dlab/optogenetics](http://www.stanford.edu/group/dlab/optogenetics)) was packaged by the viral vector core of the  
520 University of North Carolina at Chapel Hill, Chapel Hill, NC (titer of 4 x 10<sup>12</sup> particles/mL).

521 **Stereotactic Surgery for Viral Injection**

522 Stereotactic surgery was performed when rats were 6 weeks old with bodyweight around 250  
523 g. Rats were anesthetized with an intraperitoneal bolus injection of ketamine (90 mg/kg) and  
524 xylazine (40 mg/kg) mixture. The scalp was shaved, and the rats were secured in a stereotactic  
525 frame. Buprenorphine (0.05 mg/kg) was administered subcutaneously to minimize pain, and  
526 heating pads were used to prevent hypothermia. Following a midline incision, a craniotomy was  
527 made on the right hemisphere in the vHP, and injection was performed at two depths (-6.00 mm  
528 posterior to Bregma, +5.00 mm ML, -4.75 and -4.50 mm from brain surface). For optogenetic  
529 animals, 1.5  $\mu$ L of viral constructs were delivered through a 5  $\mu$ L syringe and 33-gauge beveled  
530 needle injected at 150 nL/min at each depth. Following viral injection, the needle was held in the  
531 place for 10 minutes before slow retraction. Then, the scalp incision was sutured. After the surgery,  
532 buprenorphine (0.05 mg/kg) was administered subcutaneously twice daily for 72 hours to  
533 minimize post-surgery infection and inflammation. Animals rested for six weeks before fMRI  
534 experiments were performed.

## 535 **Optical Fiber Implantation**

536 Stereotactic surgery was performed to implant custom made plastic optical fiber cannula (POF,  
537 core diameter 450  $\mu\text{m}$ ; Mitsubishi Super ESKA™ CK-20) at the viral injection site 1 – 2 hours  
538 before fMRI experiments. Rats were anesthetized with isoflurane (induction 3 % and maintenance  
539 2 %) and secured on a stereotactic frame. Following a midline incision, a craniotomy was made at  
540 the same coordinates as the viral injection site. A heating pad was used to prevent hypothermia.  
541 Before implantation, the fiber tip was beveled to facilitate insertion and minimize injury to brain  
542 tissue. Then, it was inserted with the fiber tip at a depth of 4.7 mm. The optical fiber was fixed on  
543 the skull with UV glue and dental cement, and the scalp incision was sutured. The fiber outside  
544 the brain was made opaque using heat-shrinkable sleeves to avoid undesired visual stimulation.  
545 After the surgery, buprenorphine (0.05 mg/kg) was administered subcutaneously to minimize  
546 discomfort.

## 547 **Cannula Implantation for Tetrodotoxin (TTX) Infusion**

548 Before animals were placed in the magnet, surgery was performed to implant an MRI-compatible  
549 cannula, 250- $\mu\text{m}$  internal diameter in vHP. Before surgery, animals were anesthetized with  
550 isoflurane (induction 3% and maintenance 2%) secured on a stereotactic frame. Buprenorphine  
551 (0.05 mg/kg) was administered subcutaneously to minimize discomfort before MRI experiments.  
552 The concentration of TTX used was 5-10 ng/ $\mu\text{L}$ , similar to the values used in previous in vivo  
553 studies (113, 114).

## 554 **Animal Preparation for MRI Experiments**

555 All MRI experiments were carried out on a 7T MRI scanner (PharmaScan 70/16, Bruker Biospin)  
556 using a transmit-only birdcage coil in combination with an actively decoupled receive-only surface

557 coil. After surgery, one to two drops of 2% lidocaine was applied to the chords to provide local  
558 anesthesia before endotracheal intubation. The animals were mechanically ventilated at a rate of  
559 60 breaths per minute with 1–1.5% isoflurane in room-temperature air using a ventilator (TOPO,  
560 Kent Scientific). During all fMRI experiments, animals were placed on a plastic cradle with the  
561 head fixed with a tooth bar and plastic screws in the ear canals. Rectal temperature was maintained  
562 at  $\sim 37.0$  °C using a water circulation system. Continuous physiological monitoring was performed  
563 using an MRI-compatible system (SA Instruments). Vital signs were within normal physiological  
564 ranges (rectal temperature: 36.5 – 37.5 °C, heart rate: 350 – 420 beat/min, respiration rate: 60  
565 breath/min, oxygen saturation: > 95%) throughout the experiments.

#### 566 **MRI-Synchronized Optogenetic and Auditory Stimulation**

567 An Arduino programming board synchronized the scanner trigger and the lasers for optogenetic  
568 and visual stimulation. Computers and light delivery systems were kept outside the magnet, and  
569 long optical patch cables (5–10 m) delivered light into the bore of the scanner. For optogenetic  
570 stimulation, blue light was delivered using a 473-nm DPSS laser. Light intensity was measured  
571 (PM100D, Thorlabs, USA) before each experiment as 8 mW at the fiber tip (450  $\mu\text{m}$ , NA = 0.5),  
572 corresponding to a light intensity of 40 mW/mm<sup>2</sup>. For auditory stimulation, acoustic stimuli were  
573 controlled by a computer and produced by a high frequency multi-field magnetic speaker (MF1,  
574 TDT) driven by an amplifier (SA1, TDT). Monaural stimulation was delivered through a custom-  
575 made 165 cm long rigid tube and a 6.5 cm soft tube into the animals' left ear canal. The right ear  
576 was occluded with cotton and Vaseline, to reduce the scanner noise reaching the ears. The sound  
577 pressure level (SPL) was measured by a recorder (FR2, Fostex, Japan) placed at  $\sim 2$  mm from the  
578 tip of the soft tube. The variance of the light power was maintained less than 2.5 mW/mm<sup>2</sup> and the  
579 SPL less than 2 dB. This setup has been used in our previous studies (46, 115).

580 To determine the frequency-dependent spatiotemporal characteristics of evoked vHP responses  
581 (optogenetic fMRI experiments), five frequencies were used (1 Hz, 5 Hz, 10 Hz, 20 Hz, and 40  
582 Hz) with a light intensity of 40 mW/mm<sup>2</sup>. 30 % duty cycle was used for all stimulation frequencies,  
583 except 1 Hz, which was at 10 % duty cycle. The duty cycle for 1 Hz optogenetic stimulation was  
584 reduced to avoid a very long stimulation pulse width which may not be physiological. vHP  
585 excitatory neurons were stimulated with a block design paradigm that consisted of 60 seconds  
586 light-off followed by 20 seconds light-on and 140 seconds light-off periods. Three to four trials  
587 were recorded for each frequency in an interleaved manner in each animal.

588 In combined optogenetic and auditory fMRI experiments, the effects of optogenetic stimulation  
589 in the vHP on brain baseline BOLD signals were examined by presenting 5 Hz stimulation (60  
590 seconds light-off followed by 20 seconds light-on and 140 seconds light-off periods), without  
591 presenting acoustic stimulation. This paradigm was repeated twice in each animal. Subsequently,  
592 the effects of optogenetic stimulation on auditory midbrain, thalamus, and cortex processing of  
593 sound stimulation were investigated.

594 In the vocalization experiment, two types of vocalizations (I. ‘Aversive’ Vocalizations:  
595 bandwidth: 22-25 kHz, peak frequency: 22 kHz; sound pressure level (SPL): 83 dB, obtained  
596 online from <http://www.avisoft.com/rats.htm> (46); II. ‘Postejaculatory’ Vocalizations: bandwidth:  
597 22 kHz, peak frequency: 22 kHz; SPL: 83 dB) from (91) and their temporal reversions were  
598 presented. Standard block-design paradigm was used for the auditory stimulation (40 s sound-off  
599 followed by 4 blocks of 20 s sound-on and 40 s sound-off, fMRI no. of time points = 280). During  
600 every 20 s sound-on period, the aversive vocalization (length 1.2 s, plus silence 0.8 s afterward)  
601 was repeated ten times at 60 % duty cycle, whereas the postejaculatory vocalization (length 3.6 s,  
602 plus silence 0.4 s afterward) were repeated five times at 90 % duty cycle. For each animal, this

603 paradigm was repeated six times for each type of vocalization sounds. For three of them, the  
604 forward vocalization was presented first; and for the other three, the reversed one was presented  
605 first. Note that the forward and temporally reversed vocalizations contained identical acoustic  
606 features except reversed temporal information (**Supplementary Figure 3**). Note that temporally  
607 reversed vocalizations were employed here as the control for forward (i.e., true and behaviorally  
608 relevant) vocalizations. Such temporally reversed vocalizations exhibited the identical sound  
609 pressure level (SPL that is important to BOLD response level), but triggered minimal behavioral  
610 responses (46).

611 In the control experiment, broadband noise (bandwidth: 1 – 40 kHz; SPL: 83 dB) was presented  
612 to the left ear canal of the animals in a standard block-design paradigm (40 seconds sound-off  
613 followed by four blocks of 20 seconds sound-on and 40 seconds sound-off, fMRI no. of time points  
614 = 280) (**Supplementary Figure 4**). During each 20 seconds sound-on period, the broadband noise  
615 was presented with amplitude modulation at 4 Hz and 80 % duty cycle. The optogenetic  
616 stimulation (light wavelength: 473 nm, intensity: 40 mW/mm<sup>2</sup>, pulse rate: 5 Hz, duty cycle: 30%)  
617 was continuously presented to the right vHP throughout the auditory fMRI sessions and alternated  
618 between sessions.

619 In combined TTX and auditory fMRI experiment, a total of sixteen auditory fMRI sessions  
620 were performed in each animal. After eight sessions, 5 $\mu$ L TTX (concentration: 5-10 ng/ $\mu$ L) (113,  
621 114) was infused into vHP. The next immediate session was then acquired one minute after the  
622 TTX infusion. During auditory fMRI sessions, auditory stimuli were presented to the left ear canal  
623 of the animals. Aversive vocalization and its temporal reversion were presented in standard block  
624 design paradigm (40 s sound-off followed by 4 blocks of 20 s sound-on and 40 s sound-off, fMRI  
625 no. of time points = 280). Auditory fMRI sessions were interleaved (i.e., either starting with

626 forward aversive vocalization or temporally reversed aversive vocalization; **Supplementary**  
627 **Figure 5**).

### 628 **MRI Acquisitions**

629 Scout images were first acquired to determine the coronal and sagittal planes of the brain.  
630 Twelve coronal slices with 1.0 mm thickness were positioned to cover the ascending auditory  
631 pathway with the 2<sup>nd</sup>, and 3<sup>rd</sup> slice covered the whole IC. T2-weighted images were acquired as  
632 anatomical reference using a Rapid Acquisition with Refocused Echoes (RARE) sequence (FOV  
633 = 32 x 32 mm<sup>2</sup>, data matrix = 256 x 256, RARE factor = 8, echo time (TE) = 36, repetition time  
634 (TR) = 4200 ms). All fMRI measurements were obtained using a multi-slice single-shot Gradient-  
635 Echo Echo-Planar-Imaging (GE-EPI) sequence (FOV = 32 x 32 mm<sup>2</sup>, data matrix = 64 x 64, flip  
636 angle = 56°, TE/TR = 20/1000 ms, temporal resolution = 1000ms). Note that the fiber outside was  
637 made opaque using heat-shrinkable sleeves to avoid unwanted visual stimulation.

### 638 **fMRI Data Analysis**

639 For each animal, the fMRI images from each animal were realigned to the mean image of the  
640 first fMRI session (SPM12, Wellcome Department of Imaging Neuroscience, University College  
641 London, UK). Images from each animal were co-registered to a custom-made brain template using  
642 affine transformation and Gaussian smoothing, with the criteria of maximizing normalized mutual  
643 information (SPM12). For optogenetic fMRI and auditory fMRI, data from repeated sessions were  
644 averaged, in-plane smoothed (FWHM = 1 pixel), and high-pass filtered (128 s), and then standard  
645 general linear model (GLM) was applied, to calculate the BOLD response coefficient ( $\beta$ ) maps for  
646 each stimulus (SPM12). fMRI sessions suffering from motion artifacts (>0.125 mm voxel shifts  
647 detected by realignment) and sudden physiological changes (i.e., abrupt changes in respiration

648 pattern, heart rate and oxygen saturation level) were discarded. Typically, in each animal, three  
649 fMRI sessions were averaged for vHP optogenetic stimulation only, whereas four sessions were  
650 averaged for combined auditory and vHP optogenetic stimulation. Finally, activated voxels were  
651 identified with Student's t-test on the  $\beta$  values ( $p < 0.01$ ).

652 Three regions-of-interest (ROIs) covering different IC subdivisions were defined using the  
653 Paxinos & Watson rat brain atlas. The ROI that covered the inferior colliculus (IC), medial  
654 geniculate nucleus (MGB), or auditory cortex (AC) was defined by identifying clusters of activated  
655 voxels ( $p < 0.05$ ) that were restricted within the anatomical location of each region. Anatomical  
656 locations of IC, MGB, and AC, were determined using the atlas. In individual animals, the BOLD  
657 signal profiles for each ROI were first extracted and averaged across voxels, before they were  
658 separated into six blocks (each covering a period from 10 s before to 30 s after a sound-on period)  
659 and two blocks (each covering a period from 10 s before to 50 s after an optogenetic-ON period),  
660 respectively. They were then averaged again and normalized by the mean signal intensity of the  
661 first 10 s to calculate the percentage of BOLD signal change. Final averaging was then performed  
662 across animals to generate BOLD signal profiles.

663 In individual animals,  $\beta$  values were also extracted from each ROI and averaged across voxels.  
664 The final  $\beta$  value used for comparison between the BOLD responses to the sound stimulus with  
665 and without optogenetic stimulation of the vHP was computed by averaging. Further, the  $\beta$  value  
666 difference between forward and reversed vocalizations ( $\beta_{\text{Forward}} - \beta_{\text{Reversed}}$ ), as a metric of response  
667 selectivity, was compared between with and without optogenetic stimulation. Note that the size of  
668 ROI for each IC subdivision was different, and this could influence the absolute SNR of the  
669 averaged BOLD responses.

670 **Histology, Immunohistochemistry, and Confocal imaging**

671

672       Upon completion of in vivo studies, animals were deeply anesthetized with pentobarbital and  
673 transcardially perfused with ice-cold 4% paraformaldehyde (PFA) in PBS. Brains were extracted  
674 and fixed in 4% PFA for 4 h at 4 °C. The brains were equilibrated in 20% sucrose in PBS at 4 °C  
675 overnight. Axial sections (40 µm) were prepared on a freezing microtome (model 860, AO  
676 Scientific Instruments). Consecutive sections (120 µm apart) were mounted and examined with a  
677 laser confocal microscope (Carl Zeiss LSM780). For immunohistochemistry, free-floating  
678 sections were processed with 5% normal goat serum and 0.3% Triton X-100 in PBS with primary  
679 antibodies against rabbit polyclonal to CaMKII $\alpha$  (1:400; Abcam) and guinea pig polyclonal to  
680 GABA (1:200; Abcam) at 4 °C for 24 h. After washing with PBS, sections were then incubated  
681 for 2 h at room temperature with secondary antibodies Alexa Fluor 647 conjugate goat anti-rabbit  
682 IgG and Alexa Fluor 488 conjugate goat anti-guinea pig IgG (both 1:500; Molecular Probe). Slices  
683 were then washed and mounted using FluoroShield mounting medium with DAPI (Abcam).  
684 Double or triple immunofluorescence was assessed with a laser confocal microscope (Carl Zeiss  
685 LSM780).



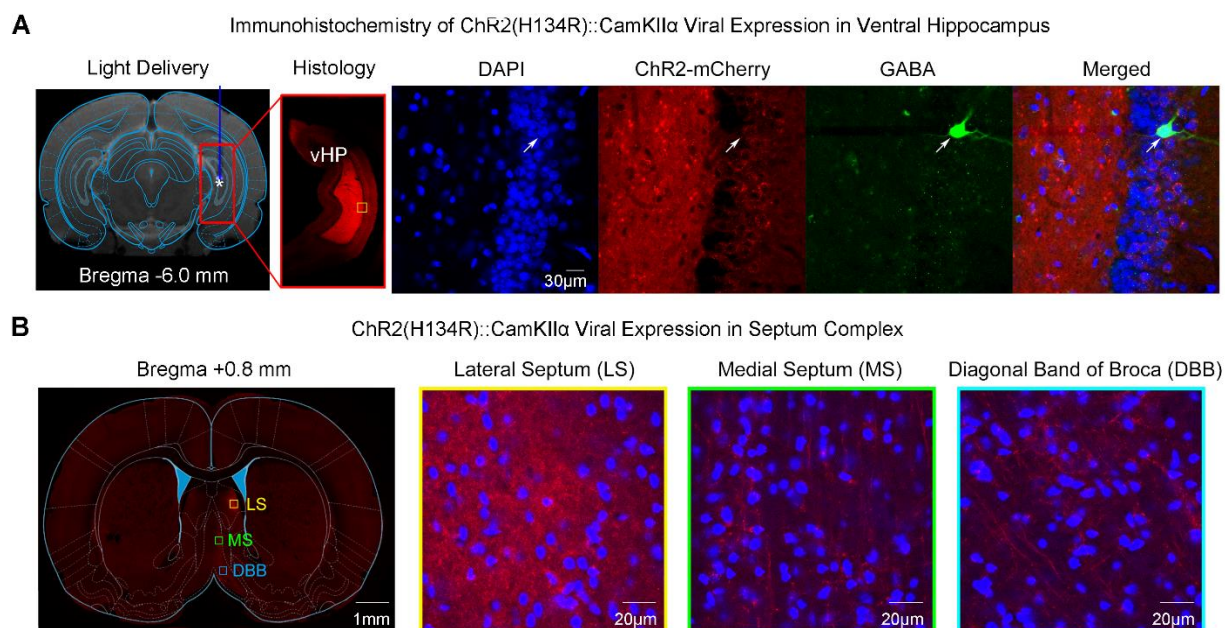

686

687 **Supplementary Figure 1. Histological characterization of ChR2::CaMKII $\alpha$  viral expression in**  
688 **ventral hippocampus (vHP) excitatory neurons demonstrates no colocalization with vHP GABAergic**  
689 **neurons and their projection targets to the septum complex. (A)** Confocal images of ChR2-mCherry  
690 expression in vHP; Lower magnification (*Left*) and higher magnification (*Right*). Overlay of images co-  
691 stained for the nuclear marker DAPI, mCherry, and inhibitory marker GABA revealed no colocalization  
692 between mCherry and vHP GABAergic neurons (indicated by white arrow). The yellow box indicates the  
693 location of magnified confocal images shown in *B*. (**B**) Confocal images of ChR2-mCherry expression in  
694 the septum complex. Lower magnification (*Left*) and higher magnification (*Right*). vHP projections synapse  
695 in the Lateral Septum (LS), Medial Septum (MS), and Diagonal Band of Broca (DBB), indicated by no  
696 colocalization between mCherry and DAPI.

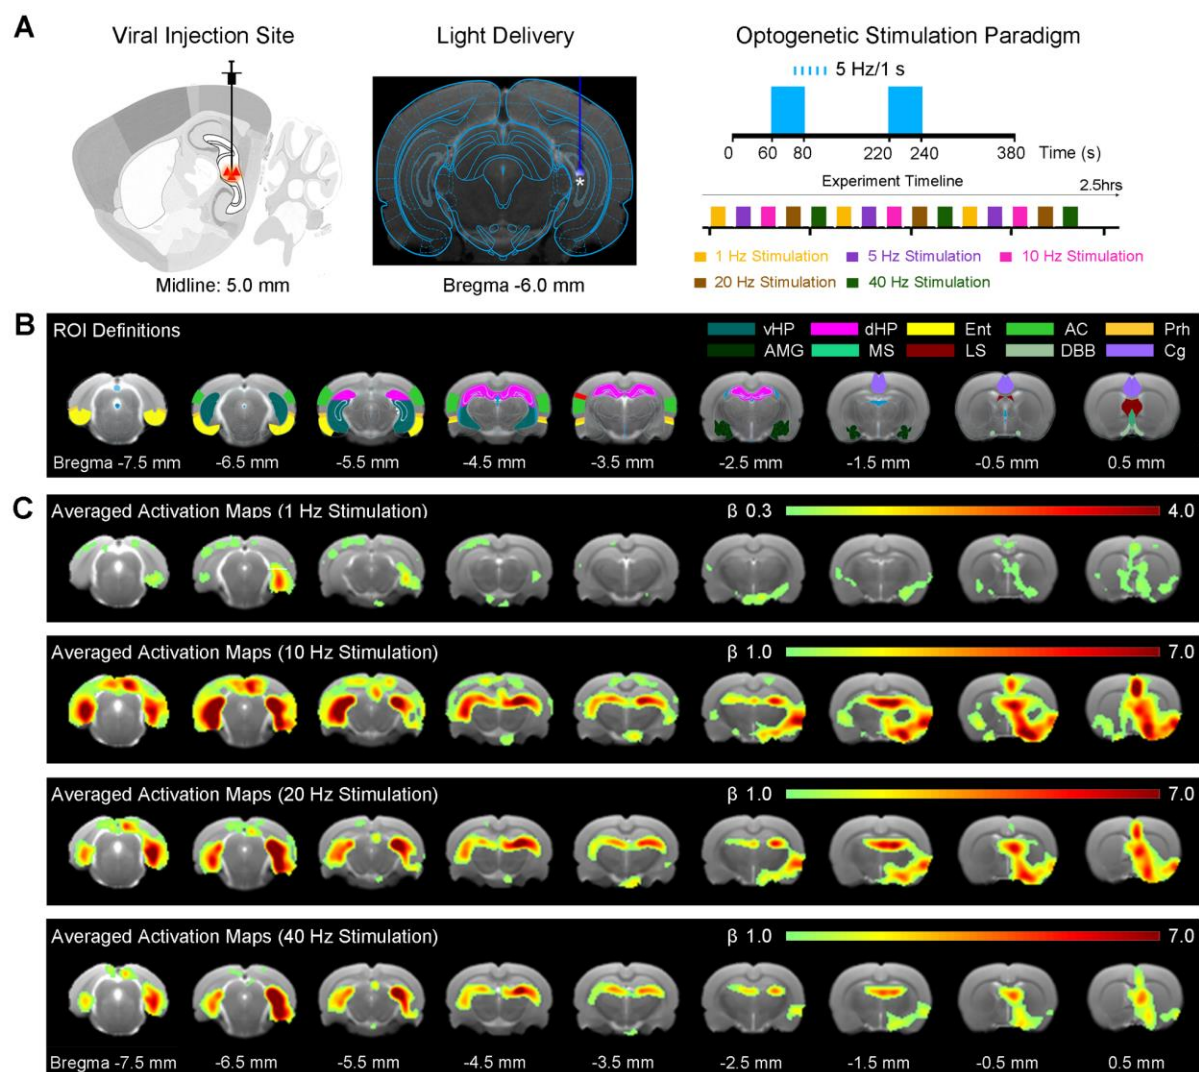

697

698 **Supplementary Figure 2. Brain-wide activations detected in the hippocampal formation, cortical and**

699 **subcortical regions during optogenetic stimulation of excitatory neurons in vHP. (A)** Schematic (*Left*)

700 and T2-weighted anatomical image (*Middle*) shows the viral injection and fiber implantation sites,

701 respectively. Optogenetic fMRI stimulation paradigm (*Right*). Optogenetic stimulations were presented in

702 a block-design paradigm (20 seconds ON; 140 seconds OFF). Five frequencies (1, 5, 10, 20, 40 Hz) were

703 interleaved by trials. (**B**) Regions of interest (ROIs) defined by the rat brain atlas to extract the BOLD signal

704 profiles. (**C**) Averaged activation ( $\beta$ ) maps of optogenetic stimulation of vHP excitatory neurons at 1, 10,

705 20, 40 Hz. Robust positive BOLD responses detected in bilateral vHP, dHP, Ent, AC, Prh, AMG, MS, LS,

706 DBB, and Cg during 5 Hz optogenetic stimulation. Other frequencies (1 Hz, 10 Hz, 20 Hz, 40 Hz) evoked

707 weaker BOLD responses in Prh, MS, LS, and Cg, while retained strong BOLD responses in vHP and dHP.

708 (n = 6; t > 3.1, corresponding to p < 0.001).

709 Abbreviations: Ventral Hippocampus (vHP); Dorsal Hippocampus (dHP); Entorhinal Cortex (Ent);

710 Auditory Cortex (AC); Perirhinal Cortex (Prh); Amygdala (AMG); Medial Septum (MS); Lateral Septum

711 (LS); Diagonal Band of Broca (DBB); Cingulate Cortex (Cg).

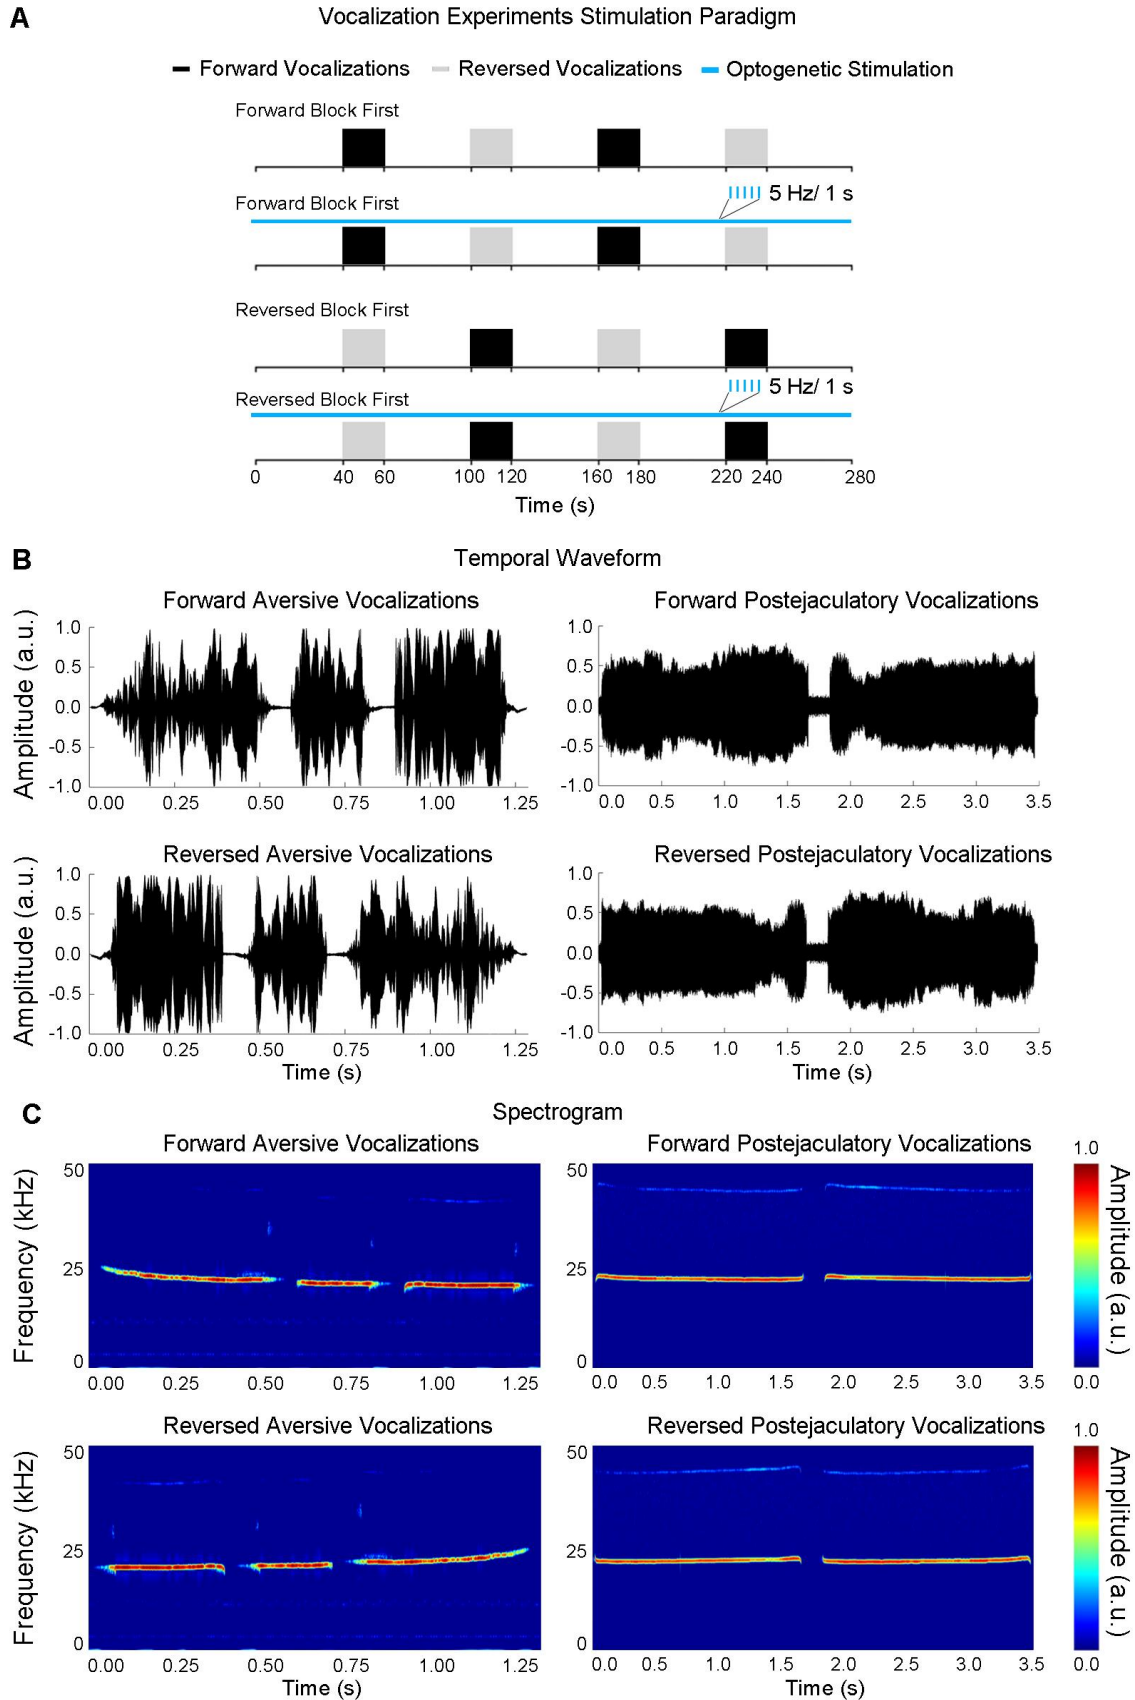

713 **Supplementary Figure 3. Auditory and optogenetic stimulation paradigms for the negative/aversive**  
714 **and positive/postejaculatory vocalizations experiments. (A)** The standard block paradigm (20 seconds  
715 ON and 40 seconds OFF) was used to present rat vocalizations to the left ear. Forward and reversed  
716 vocalizations were interleaved during each auditory fMRI session. The paradigm was repeated six times  
717 for each animal, with the first block occupied by forward and reversed vocalization each three times, while  
718 continuous 5 Hz optogenetic stimulation was alternating between auditory fMRI sessions. **(B)** The temporal  
719 waveforms of forward (*top left*) and temporally reversed (*bottom left*) aversive vocalizations and forward  
720 (*top right*) and temporally reversed (*bottom right*) postejaculatory vocalizations. **(C)** The spectrograms of  
721 forward (*top left*) and temporally reversed (*bottom left*) aversive vocalizations and forward (*top right*) and  
722 temporally reversed (*bottom right*) postejaculatory vocalizations.

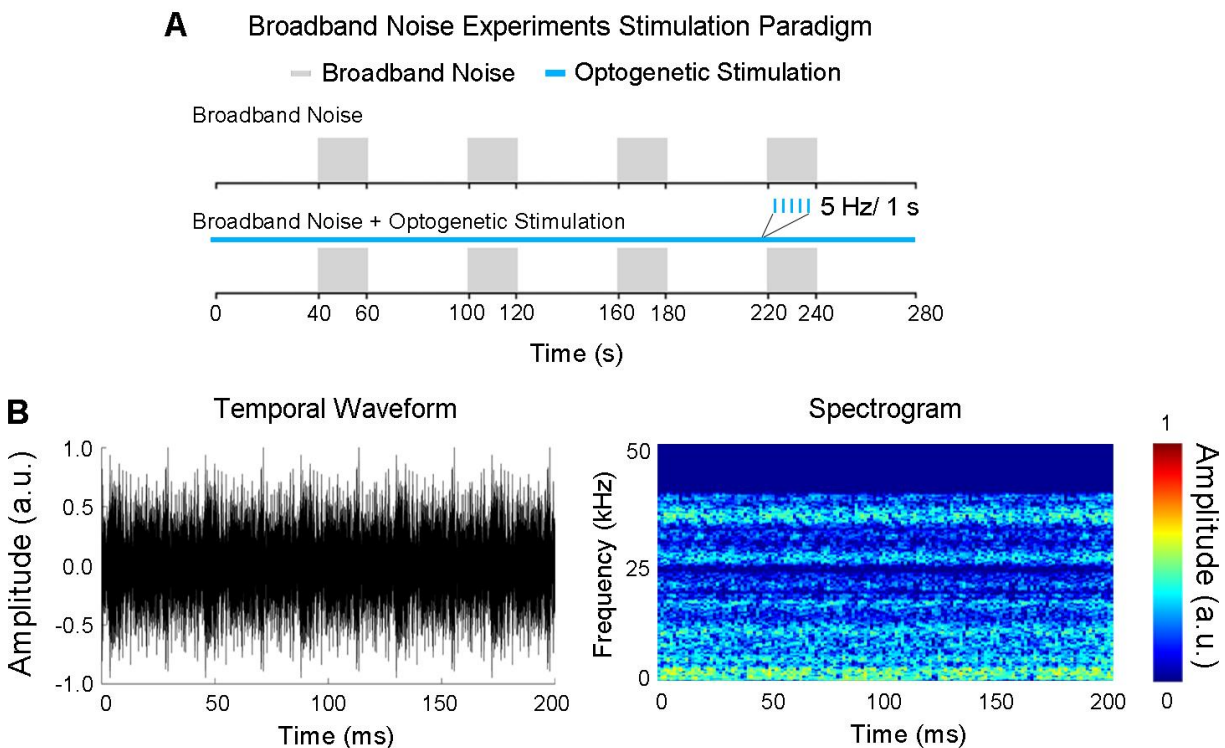

723

724 **Supplementary Figure 4. Auditory and optogenetic stimulation paradigms for broadband acoustic**  
725 **noise experiments.** (A) The standard block paradigm (20 seconds ON and 40 seconds OFF) used to present  
726 broadband noise to the left ear, while continuous 5 Hz optogenetic stimulation was alternating between  
727 auditory fMRI sessions. (B) The temporal waveforms of the broadband noise. (C) The spectrograms of the  
728 broadband noise.

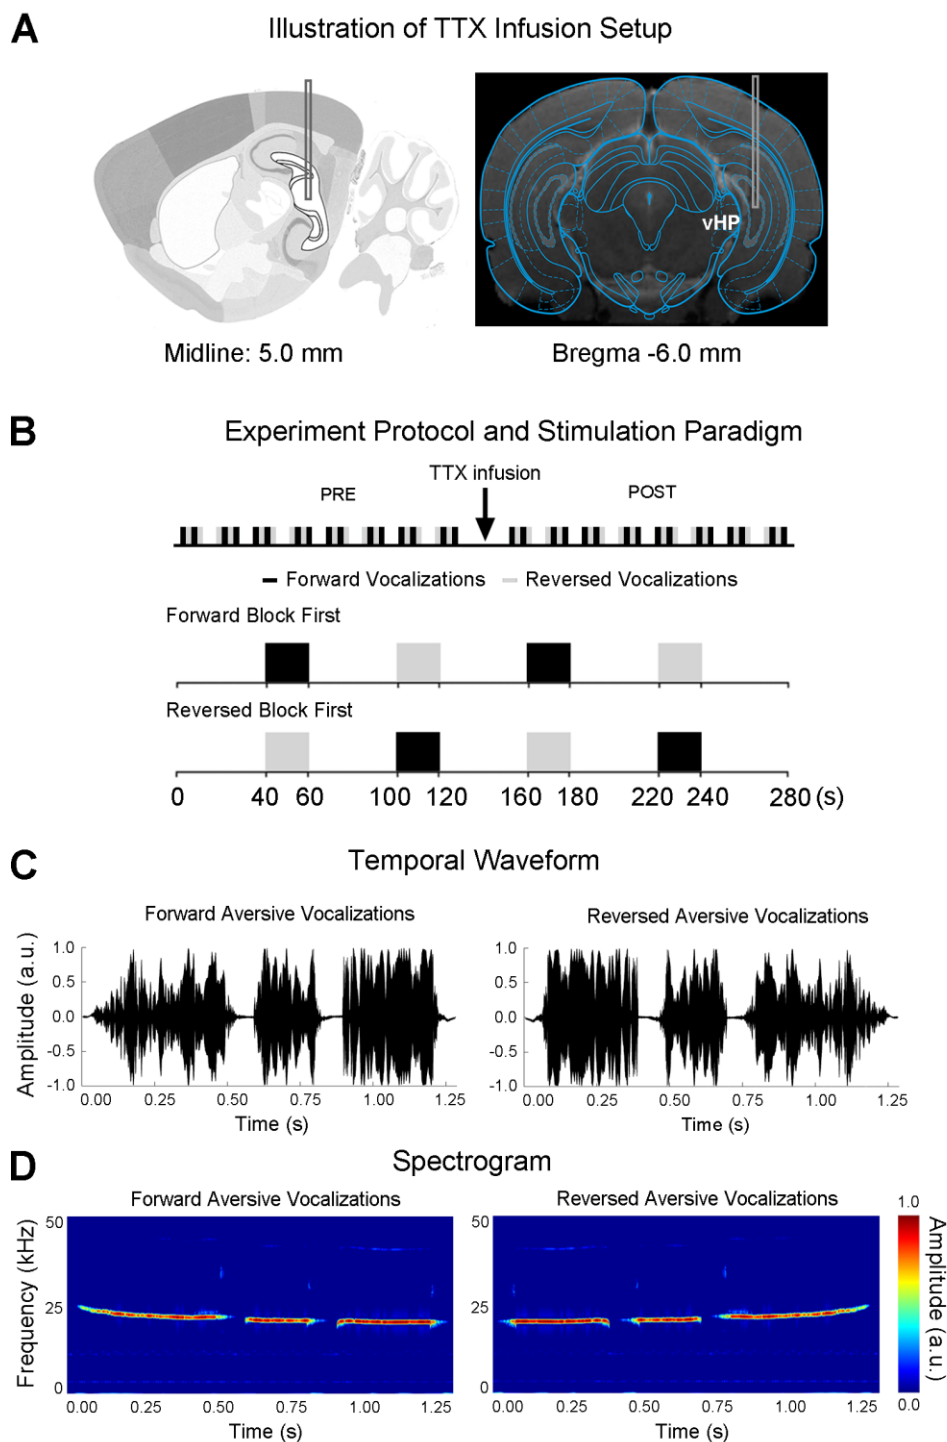

729

730 **Supplementary Figure 5. Illustration of tetrodotoxin (TTX) infusion to vHP, and corresponding**

731 **auditory fMRI stimulation paradigm for the negative/aversive vocalization experiments. (A)** TTX was

732 **infused to the vHP with an implanted cannula. (B)** Sixteen fMRI sessions were typically acquired during

733 an experiment. TTX was infused after eight fMRI sessions. Standard block design paradigm (20 seconds  
734 ON and 40 seconds OFF) was used to present vocalizations to the left ear. Forward and reversed  
735 vocalizations were interleaved during each auditory fMRI session. **(C)** The temporal waveform of forward  
736 (*left*) and temporally reversed (*right*) aversive vocalizations. **(D)** The spectrograms of forward (*left*) and  
737 temporally reversed (*right*) aversive vocalizations.



## 738 References

- 739 1. A. A. Sitko, L. V. Goodrich, Making sense of neural development by comparing wiring strategies  
740 for seeing and hearing. *Science* **371** (2021).
- 741 2. C. Schreiner, J. A. Winer, *The inferior colliculus* (Springer, 2005).
- 742 3. M. S. Malmierca, "Auditory system" in *The rat nervous system*. (Elsevier, 2015), pp. 865-946.
- 743 4. G. Chechik *et al.*, Reduction of information redundancy in the ascending auditory pathway.  
744 *Neuron* **51**, 359-368 (2006).
- 745 5. A. M. Leaver, J. P. Rauschecker, Cortical representation of natural complex sounds: effects of  
746 acoustic features and auditory object category. *J Neurosci* **30**, 7604-7612 (2010).
- 747 6. J. J. Eggermont, Between sound and perception: reviewing the search for a neural code. *Hear Res*  
748 **157**, 1-42 (2001).
- 749 7. N. Suga, X. Ma, Multiparametric corticofugal modulation and plasticity in the auditory system.  
750 *Nat Rev Neurosci* **4**, 783-794 (2003).
- 751 8. G. Kim, A. Doupe, Organized representation of spectrotemporal features in songbird auditory  
752 forebrain. *J Neurosci* **31**, 16977-16990 (2011).
- 753 9. M. Ono, D. C. Bishop, D. L. Oliver, Identified GABAergic and Glutamatergic Neurons in the  
754 Mouse Inferior Colliculus Share Similar Response Properties. *J Neurosci* **37**, 8952-8964 (2017).
- 755 10. J. Sturm, T. Nguyen, K. Kandler, Development of intrinsic connectivity in the central nucleus of  
756 the mouse inferior colliculus. *J Neurosci* **34**, 15032-15046 (2014).
- 757 11. K. I. Nagel, A. J. Doupe, Organizing principles of spectro-temporal encoding in the avian primary  
758 auditory area field L. *Neuron* **58**, 938-955 (2008).
- 759 12. D. M. Schneider, S. M. Woolley, Extra-classical tuning predicts stimulus-dependent receptive  
760 fields in auditory neurons. *J Neurosci* **31**, 11867-11878 (2011).
- 761 13. S. M. Woolley, P. R. Gill, F. E. Theunissen, Stimulus-dependent auditory tuning results in  
762 synchronous population coding of vocalizations in the songbird midbrain. *J Neurosci* **26**, 2499-  
763 2512 (2006).
- 764 14. C. V. Portfors, Types and functions of ultrasonic vocalizations in laboratory rats and mice. *J Am*  
765 *Assoc Lab Anim Sci* **46**, 28-34 (2007).
- 766 15. S. M. Woolley, C. V. Portfors, Conserved mechanisms of vocalization coding in mammalian and  
767 songbird auditory midbrain. *Hear Res* **305**, 45-56 (2013).
- 768 16. A. M. Simmons, "Perspectives and progress in animal acoustic communication" in *Acoustic*  
769 *communication*. (Springer, 2003), pp. 1-14.
- 770 17. F. E. Theunissen, J. E. Elie, Neural processing of natural sounds. *Nat Rev Neurosci* **15**, 355-366  
771 (2014).
- 772 18. T. Overath, J. H. McDermott, J. M. Zarate, D. Poeppel, The cortical analysis of speech-specific  
773 temporal structure revealed by responses to sound quilts. *Nat Neurosci* **18**, 903-911 (2015).
- 774 19. G. W. Zhang *et al.*, A Non-canonical Reticular-Limbic Central Auditory Pathway via Medial  
775 Septum Contributes to Fear Conditioning. *Neuron* **97**, 406-417 e404 (2018).
- 776 20. D. Aronov, R. Nevers, D. W. Tank, Mapping of a non-spatial dimension by the hippocampal-  
777 entorhinal circuit. *Nature* **543**, 719-722 (2017).
- 778 21. W. Guo, B. Robert, D. B. Polley, The Cholinergic Basal Forebrain Links Auditory Stimuli with  
779 Delayed Reinforcement to Support Learning. *Neuron* **103**, 1164-1177 e1166 (2019).
- 780 22. C. Xiao, Y. Liu, J. Xu, X. Gan, Z. Xiao, Septal and Hippocampal Neurons Contribute to Auditory  
781 Relay and Fear Conditioning. *Front Cell Neurosci* **12**, 102 (2018).
- 782 23. J. A. Winer, Decoding the auditory corticofugal systems. *Hear Res* **212**, 1-8 (2006).
- 783 24. X. R. Xiong *et al.*, Auditory cortex controls sound-driven innate defense behaviour through  
784 corticofugal projections to inferior colliculus. *Nat Commun* **6**, 7224 (2015).
- 785 25. J. M. Blackwell, A. M. Lesicko, W. Rao, M. De Biasi, M. N. Geffen, Auditory cortex shapes  
786 sound responses in the inferior colliculus. *Elife* **9** (2020).

- 787 26. A. M. H. Lesicko, S. K. Sons, D. A. Llano, Circuit Mechanisms Underlying the Segregation and  
788 Integration of Parallel Processing Streams in the Inferior Colliculus. *J Neurosci* **40**, 6328-6344  
789 (2020).
- 790 27. L. Chen, X. Wang, S. Ge, Q. Xiong, Medial geniculate body and primary auditory cortex  
791 differentially contribute to striatal sound representations. *Nat Commun* **10**, 418 (2019).
- 792 28. B. M. J. Olthof, A. Rees, S. E. Gartside, Multiple Nonauditory Cortical Regions Innervate the  
793 Auditory Midbrain. *J Neurosci* **39**, 8916-8928 (2019).
- 794 29. R. A. Marsh, Z. M. Fuzessery, C. D. Grose, J. J. Wenstrup, Projection to the inferior colliculus  
795 from the basal nucleus of the amygdala. *J Neurosci* **22**, 10449-10460 (2002).
- 796 30. C. M. Bird, N. Burgess, The hippocampus and memory: insights from spatial processing. *Nat Rev*  
797 *Neurosci* **9**, 182-194 (2008).
- 798 31. G. Buzsaki, E. I. Moser, Memory, navigation and theta rhythm in the hippocampal-entorhinal  
799 system. *Nat Neurosci* **16**, 130-138 (2013).
- 800 32. J. Lisman *et al.*, Viewpoints: how the hippocampus contributes to memory, navigation and  
801 cognition. *Nat Neurosci* **20**, 1434-1447 (2017).
- 802 33. D. Aronov, R. Nevers, D. W. Tank, Mapping of a non-spatial dimension by the hippocampal-  
803 entorhinal circuit. *Nature* **543**, 719-722 (2017).
- 804 34. S. Terada, Y. Sakurai, H. Nakahara, S. Fujisawa, Temporal and Rate Coding for Discrete Event  
805 Sequences in the Hippocampus. *Neuron* **94**, 1248-1262 e1244 (2017).
- 806 35. D. Bendor, M. A. Wilson, Biasing the content of hippocampal replay during sleep. *Nat Neurosci*  
807 **15**, 1439-1444 (2012).
- 808 36. G. Rothschild, E. Eban, L. M. Frank, A cortical-hippocampal-cortical loop of information  
809 processing during memory consolidation. *Nat Neurosci* **20**, 251-259 (2017).
- 810 37. G. Buzsaki, The hippocampo-neocortical dialogue. *Cereb Cortex* **6**, 81-92 (1996).
- 811 38. N. M. van Strien, N. L. Cappaert, M. P. Witter, The anatomy of memory: an interactive overview  
812 of the parahippocampal-hippocampal network. *Nat Rev Neurosci* **10**, 272-282 (2009).
- 813 39. S. W. Oh *et al.*, A mesoscale connectome of the mouse brain. *Nature* **508**, 207-214 (2014).
- 814 40. M. M. Munoz-Lopez, A. Mohedano-Moriano, R. Insausti, Anatomical pathways for auditory  
815 memory in primates. *Front Neuroanat* **4**, 129 (2010).
- 816 41. L. A. Cenquizca, L. W. Swanson, Spatial organization of direct hippocampal field CA1 axonal  
817 projections to the rest of the cerebral cortex. *Brain Res Rev* **56**, 1-26 (2007).
- 818 42. M. S. Fanselow, H. W. Dong, Are the dorsal and ventral hippocampus functionally distinct  
819 structures? *Neuron* **65**, 7-19 (2010).
- 820 43. B. A. Strange, M. P. Witter, E. S. Lein, E. I. Moser, Functional organization of the hippocampal  
821 longitudinal axis. *Nat Rev Neurosci* **15**, 655-669 (2014).
- 822 44. E. V. Lubenov, A. G. Siapas, Hippocampal theta oscillations are travelling waves. *Nature* **459**,  
823 534-539 (2009).
- 824 45. J. Patel, S. Fujisawa, A. Berenyi, S. Royer, G. Buzsaki, Traveling theta waves along the entire  
825 septotemporal axis of the hippocampus. *Neuron* **75**, 410-417 (2012).
- 826 46. P. P. Gao, J. W. Zhang, S. J. Fan, D. H. Sanes, E. X. Wu, Auditory midbrain processing is  
827 differentially modulated by auditory and visual cortices: An auditory fMRI study. *Neuroimage*  
828 **123**, 22-32 (2015).
- 829 47. M. M. Asokan, R. S. Williamson, K. E. Hancock, D. B. Polley, Sensory overamplification in  
830 layer 5 auditory corticofugal projection neurons following cochlear nerve synaptic damage. *Nat*  
831 *Commun* **9**, 2468 (2018).
- 832 48. J. P. Rauschecker, S. K. Scott, Maps and streams in the auditory cortex: nonhuman primates  
833 illuminate human speech processing. *Nat Neurosci* **12**, 718-724 (2009).
- 834 49. J. P. Rauschecker, B. Tian, Mechanisms and streams for processing of "what" and "where" in  
835 auditory cortex. *Proc Natl Acad Sci U S A* **97**, 11800-11806 (2000).
- 836 50. W. Guo, A. R. Clause, A. Barth-Marion, D. B. Polley, A Corticothalamic Circuit for Dynamic  
837 Switching between Feature Detection and Discrimination. *Neuron* **95**, 180-194 e185 (2017).

- 838 51. P. G. Mihai *et al.*, Modulation of tonotopic ventral medial geniculate body is behaviorally  
839 relevant for speech recognition. *Elife* **8** (2019).
- 840 52. B. Diaz, F. Hintz, S. J. Kiebel, K. von Kriegstein, Dysfunction of the auditory thalamus in  
841 developmental dyslexia. *Proc Natl Acad Sci U S A* **109**, 13841-13846 (2012).
- 842 53. R. A. Felix, 2nd, B. Gourevitch, C. V. Portfors, Subcortical pathways: Towards a better  
843 understanding of auditory disorders. *Hear Res* **362**, 48-60 (2018).
- 844 54. J. A. Winer, C. E. Schreiner, "The central auditory system: a functional analysis" in *The inferior*  
845 *colliculus*. (Springer, 2005), pp. 1-68.
- 846 55. G. D. Pollak, The dominant role of inhibition in creating response selectivities for communication  
847 calls in the brainstem auditory system. *Hear Res* **305**, 86-101 (2013).
- 848 56. S. M. Woolley, C. V. Portfors, Conserved mechanisms of vocalization coding in mammalian and  
849 songbird auditory midbrain. *Hear Res* **305**, 45-56 (2013).
- 850 57. C. Muller, S. Remy, Septo-hippocampal interaction. *Cell Tissue Res* **373**, 565-575 (2018).
- 851 58. M. F. Yeckel, T. W. Berger, Feedforward excitation of the hippocampus by afferents from the  
852 entorhinal cortex: redefinition of the role of the trisynaptic pathway. *Proc Natl Acad Sci U S A*  
853 **87**, 5832-5836 (1990).
- 854 59. Y. Yang *et al.*, Opposite monosynaptic scaling of BLP-vCA1 inputs governs hopefulness- and  
855 helplessness-modulated spatial learning and memory. *Nat Commun* **7**, 11935 (2016).
- 856 60. A. C. Felix-Ortiz, K. M. Tye, Amygdala inputs to the ventral hippocampus bidirectionally  
857 modulate social behavior. *J Neurosci* **34**, 586-595 (2014).
- 858 61. P. H. Janak, K. M. Tye, From circuits to behaviour in the amygdala. *Nature* **517**, 284-292 (2015).
- 859 62. A. R. Preston, H. Eichenbaum, Interplay of hippocampus and prefrontal cortex in memory. *Curr*  
860 *Biol* **23**, R764-773 (2013).
- 861 63. E. T. Rolls, Limbic systems for emotion and for memory, but no single limbic system. *Cortex* **62**,  
862 119-157 (2015).
- 863 64. D. H. Lindquist, L. E. Jarrard, T. H. Brown, Perirhinal cortex supports delay fear conditioning to  
864 rat ultrasonic social signals. *J Neurosci* **24**, 3610-3617 (2004).
- 865 65. D. Yaniv, A. Desmedt, R. Jaffard, G. Richter-Levin, The amygdala and appraisal processes:  
866 stimulus and response complexity as an organizing factor. *Brain Res Brain Res Rev* **44**, 179-186  
867 (2004).
- 868 66. R. S. Williamson, D. B. Polley, Parallel pathways for sound processing and functional  
869 connectivity among layer 5 and 6 auditory corticofugal neurons. *Elife* **8** (2019).
- 870 67. N. Y. Homma *et al.*, A Role for Auditory Corticothalamic Feedback in the Perception of  
871 Complex Sounds. *J Neurosci* **37**, 6149-6161 (2017).
- 872 68. T. Donishi, A. Kimura, H. Imbe, I. Yokoi, Y. Kaneoke, Sub-threshold cross-modal sensory  
873 interaction in the thalamus: lemniscal auditory response in the medial geniculate nucleus is  
874 modulated by somatosensory stimulation. *Neuroscience* **174**, 200-215 (2011).
- 875 69. G. Corder *et al.*, An amygdalar neural ensemble that encodes the unpleasantness of pain. *Science*  
876 **363**, 276-281 (2019).
- 877 70. A. Singh *et al.*, Mapping Cortical Integration of Sensory and Affective Pain Pathways. *Curr Biol*  
878 **30**, 1703-1715 e1705 (2020).
- 879 71. K. M. Barry, D. Robertson, W. Mulders, Medial geniculate neurons show diverse effects in  
880 response to electrical stimulation of prefrontal cortex. *Hear Res* **353**, 204-212 (2017).
- 881 72. X. J. Yu, X. X. Xu, S. He, J. He, Change detection by thalamic reticular neurons. *Nat Neurosci*  
882 **12**, 1165-1170 (2009).
- 883 73. M. Aizenberg *et al.*, Projection from the Amygdala to the Thalamic Reticular Nucleus Amplifies  
884 Cortical Sound Responses. *Cell Rep* **28**, 605-615 e604 (2019).
- 885 74. A. Poremba, M. Gabriel, Amygdalar efferents initiate auditory thalamic discriminative training-  
886 induced neuronal activity. *J Neurosci* **21**, 270-278 (2001).
- 887 75. S. O'Mara, The subiculum: what it does, what it might do, and what neuroanatomy has yet to tell  
888 us. *J Anat* **207**, 271-282 (2005).

- 889 76. L. R. Squire, H. Schmolck, S. M. Stark, Impaired auditory recognition memory in amnesic  
890 patients with medial temporal lobe lesions. *Learn Mem* **8**, 252-256 (2001).
- 891 77. J. Plailly, B. Tillmann, J. P. Royet, The feeling of familiarity of music and odors: the same neural  
892 signature? *Cereb Cortex* **17**, 2650-2658 (2007).
- 893 78. G. Vega-Flores *et al.*, The GABAergic septohippocampal pathway is directly involved in internal  
894 processes related to operant reward learning. *Cereb Cortex* **24**, 2093-2107 (2014).
- 895 79. I. Klinkenberg, A. Blokland, The validity of scopolamine as a pharmacological model for  
896 cognitive impairment: a review of animal behavioral studies. *Neurosci Biobehav Rev* **34**, 1307-  
897 1350 (2010).
- 898 80. C. Chavez, L. Zaborszky, Basal Forebrain Cholinergic-Auditory Cortical Network: Primary  
899 Versus Nonprimary Auditory Cortical Areas. *Cereb Cortex* **27**, 2335-2347 (2017).
- 900 81. N. C. Tronson *et al.*, Segregated populations of hippocampal principal CA1 neurons mediating  
901 conditioning and extinction of contextual fear. *J Neurosci* **29**, 3387-3394 (2009).
- 902 82. H. J. Gritton *et al.*, Cortical cholinergic signaling controls the detection of cues. *Proc Natl Acad*  
903 *Sci U S A* **113**, E1089-1097 (2016).
- 904 83. J. J. Roland *et al.*, Medial septum-diagonal band of Broca (MSDB) GABAergic regulation of  
905 hippocampal acetylcholine efflux is dependent on cognitive demands. *J Neurosci* **34**, 506-514  
906 (2014).
- 907 84. J. M. Staib, R. Della Valle, D. K. Knox, Disruption of medial septum and diagonal bands of  
908 Broca cholinergic projections to the ventral hippocampus disrupt auditory fear memory.  
909 *Neurobiol Learn Mem* **152**, 71-79 (2018).
- 910 85. A. Nelson, R. Mooney, The Basal Forebrain and Motor Cortex Provide Convergent yet Distinct  
911 Movement-Related Inputs to the Auditory Cortex. *Neuron* **90**, 635-648 (2016).
- 912 86. L. Jiang *et al.*, Cholinergic Signaling Controls Conditioned Fear Behaviors and Enhances  
913 Plasticity of Cortical-Amygdala Circuits. *Neuron* **90**, 1057-1070 (2016).
- 914 87. M. Siegel, K. P. Kording, P. Konig, Integrating top-down and bottom-up sensory processing by  
915 somato-dendritic interactions. *J Comput Neurosci* **8**, 161-173 (2000).
- 916 88. A. K. Engel, P. Fries, W. Singer, Dynamic predictions: oscillations and synchrony in top-down  
917 processing. *Nat Rev Neurosci* **2**, 704-716 (2001).
- 918 89. R. Mooney, The neurobiology of innate and learned vocalizations in rodents and songbirds. *Curr*  
919 *Opin Neurobiol* **64**, 24-31 (2020).
- 920 90. E. J. Mahrt, D. J. Perkel, L. Tong, E. W. Rubel, C. V. Portfors, Engineered deafness reveals that  
921 mouse courtship vocalizations do not require auditory experience. *J Neurosci* **33**, 5573-5583  
922 (2013).
- 923 91. M. Bialy, W. Bogacki-Rychlik, K. Kasarello, E. Nikolaev, E. M. Sajdel-Sulkowska, Modulation  
924 of 22-khz postejaculatory vocalizations by conditioning to new place: Evidence for expression of  
925 a positive emotional state. *Behav Neurosci* **130**, 415-421 (2016).
- 926 92. M. Bialy, M. Podobinska, J. Barski, W. Bogacki-Rychlik, E. M. Sajdel-Sulkowska, Distinct  
927 classes of low frequency ultrasonic vocalizations in rats during sexual interactions relate to  
928 different emotional states. *Acta Neurobiol Exp (Wars)* **79**, 1-12 (2019).
- 929 93. H. Eichenbaum, Time cells in the hippocampus: a new dimension for mapping memories. *Nat*  
930 *Rev Neurosci* **15**, 732-744 (2014).
- 931 94. R. P. Kesner, M. R. Hunsaker, P. E. Gilbert, The role of CA1 in the acquisition of an object-trace-  
932 odor paired associate task. *Behav Neurosci* **119**, 781-786 (2005).
- 933 95. L. M. DeVito *et al.*, Vasopressin 1b receptor knock-out impairs memory for temporal order. *J*  
934 *Neurosci* **29**, 2676-2683 (2009).
- 935 96. A. R. Mayes *et al.*, Memory for single items, word pairs, and temporal order of different kinds in  
936 a patient with selective hippocampal lesions. *Cogn Neuropsychol* **18**, 97-123 (2001).
- 937 97. H. J. Spiers, N. Burgess, T. Hartley, F. Vargha-Khadem, J. O'Keefe, Bilateral hippocampal  
938 pathology impairs topographical and episodic memory but not visual pattern matching.  
939 *Hippocampus* **11**, 715-725 (2001).

- 940 98. N. S. Jacobs, T. A. Allen, N. Nguyen, N. J. Fortin, Critical role of the hippocampus in memory  
941 for elapsed time. *J Neurosci* **33**, 13888-13893 (2013).
- 942 99. K. Z. Tanaka *et al.*, The hippocampal engram maps experience but not place. *Science* **361**, 392-  
943 397 (2018).
- 944 100. D. A. Ross, P. Sadil, D. M. Wilson, R. A. Cowell, Hippocampal Engagement during Recall  
945 Depends on Memory Content. *Cereb Cortex* **28**, 2685-2698 (2018).
- 946 101. L. M. Rangel *et al.*, Rhythmic coordination of hippocampal neurons during associative memory  
947 processing. *Elife* **5**, e09849 (2016).
- 948 102. D. B. Headley, D. Pare, Common oscillatory mechanisms across multiple memory systems. *NPJ*  
949 *Sci Learn* **2** (2017).
- 950 103. E. Nyhus, T. Curran, Functional role of gamma and theta oscillations in episodic memory.  
951 *Neurosci Biobehav Rev* **34**, 1023-1035 (2010).
- 952 104. P. B. Sederberg, M. J. Kahana, M. W. Howard, E. J. Donner, J. R. Madsen, Theta and gamma  
953 oscillations during encoding predict subsequent recall. *J Neurosci* **23**, 10809-10814 (2003).
- 954 105. G. Dragoi, Cell assemblies, sequences and temporal coding in the hippocampus. *Curr Opin*  
955 *Neurobiol* **64**, 111-118 (2020).
- 956 106. D. B. Headley, N. M. Weinberger, Fear conditioning enhances gamma oscillations and their  
957 entrainment of neurons representing the conditioned stimulus. *J Neurosci* **33**, 5705-5717 (2013).
- 958 107. L. L. Colgin, Rhythms of the hippocampal network. *Nat Rev Neurosci* **17**, 239-249 (2016).
- 959 108. M. J. Jutras, P. Fries, E. A. Buffalo, Oscillatory activity in the monkey hippocampus during  
960 visual exploration and memory formation. *Proc Natl Acad Sci U S A* **110**, 13144-13149 (2013).
- 961 109. G. Buzsaki, Theta rhythm of navigation: link between path integration and landmark navigation,  
962 episodic and semantic memory. *Hippocampus* **15**, 827-840 (2005).
- 963 110. A. Sirota *et al.*, Entrainment of neocortical neurons and gamma oscillations by the hippocampal  
964 theta rhythm. *Neuron* **60**, 683-697 (2008).
- 965 111. A. G. Siapas, E. V. Lubenov, M. A. Wilson, Prefrontal phase locking to hippocampal theta  
966 oscillations. *Neuron* **46**, 141-151 (2005).
- 967 112. J. J. Chrobak, G. Buzsaki, Gamma oscillations in the entorhinal cortex of the freely behaving rat.  
968 *J Neurosci* **18**, 388-398 (1998).
- 969 113. P. Telensky *et al.*, Functional inactivation of the rat hippocampus disrupts avoidance of a moving  
970 object. *Proc Natl Acad Sci U S A* **108**, 5414-5418 (2011).
- 971 114. R. W. Chan *et al.*, Low-frequency hippocampal-cortical activity drives brain-wide resting-state  
972 functional MRI connectivity. *Proc Natl Acad Sci U S A* **114**, E6972-E6981 (2017).
- 973 115. A. T. L. Leong *et al.*, Optogenetic auditory fMRI reveals the effects of visual cortical inputs on  
974 auditory midbrain response. *Sci Rep* **8**, 8736 (2018).

975

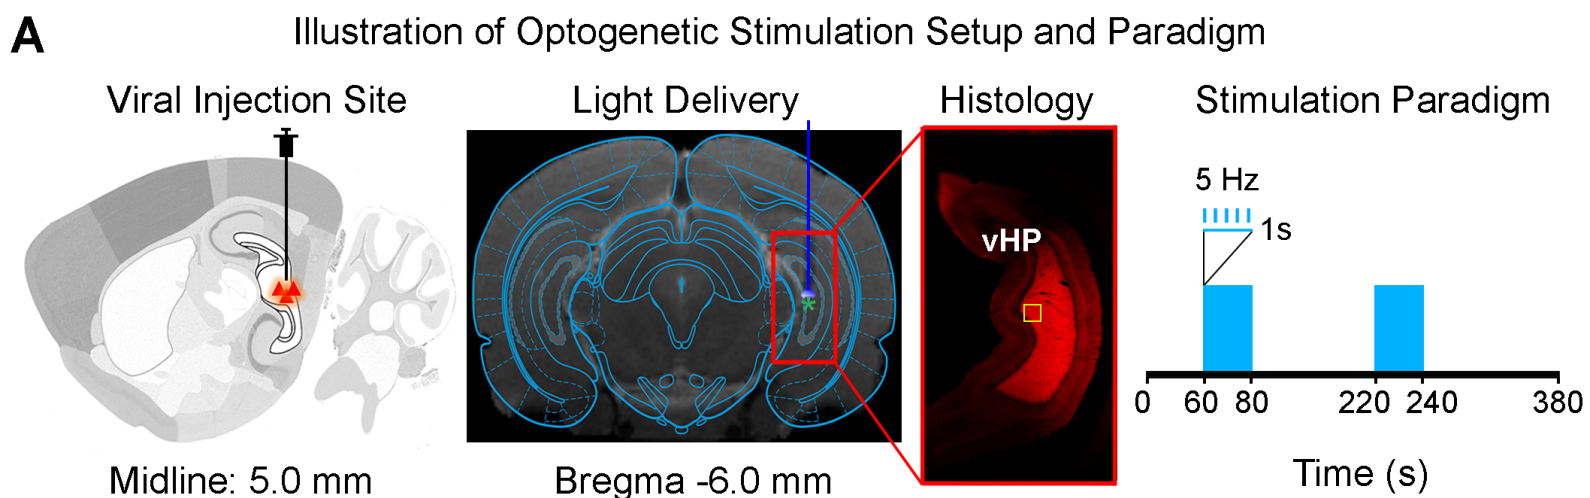

**B** Immunohistochemistry of ChR2(H134R)::CamKII $\alpha$  Viral Expression in vHP

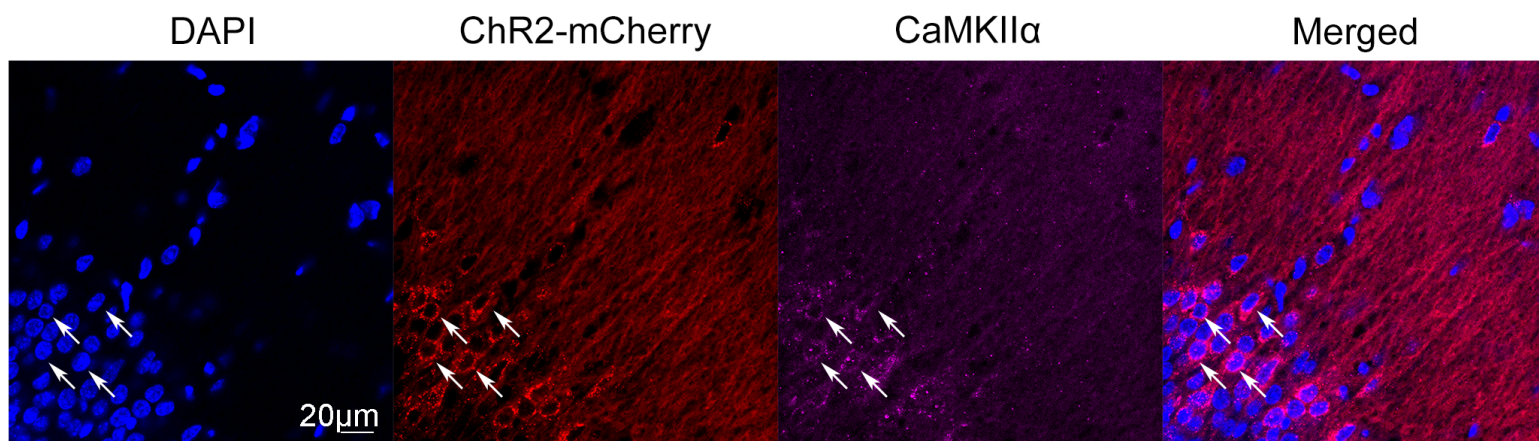

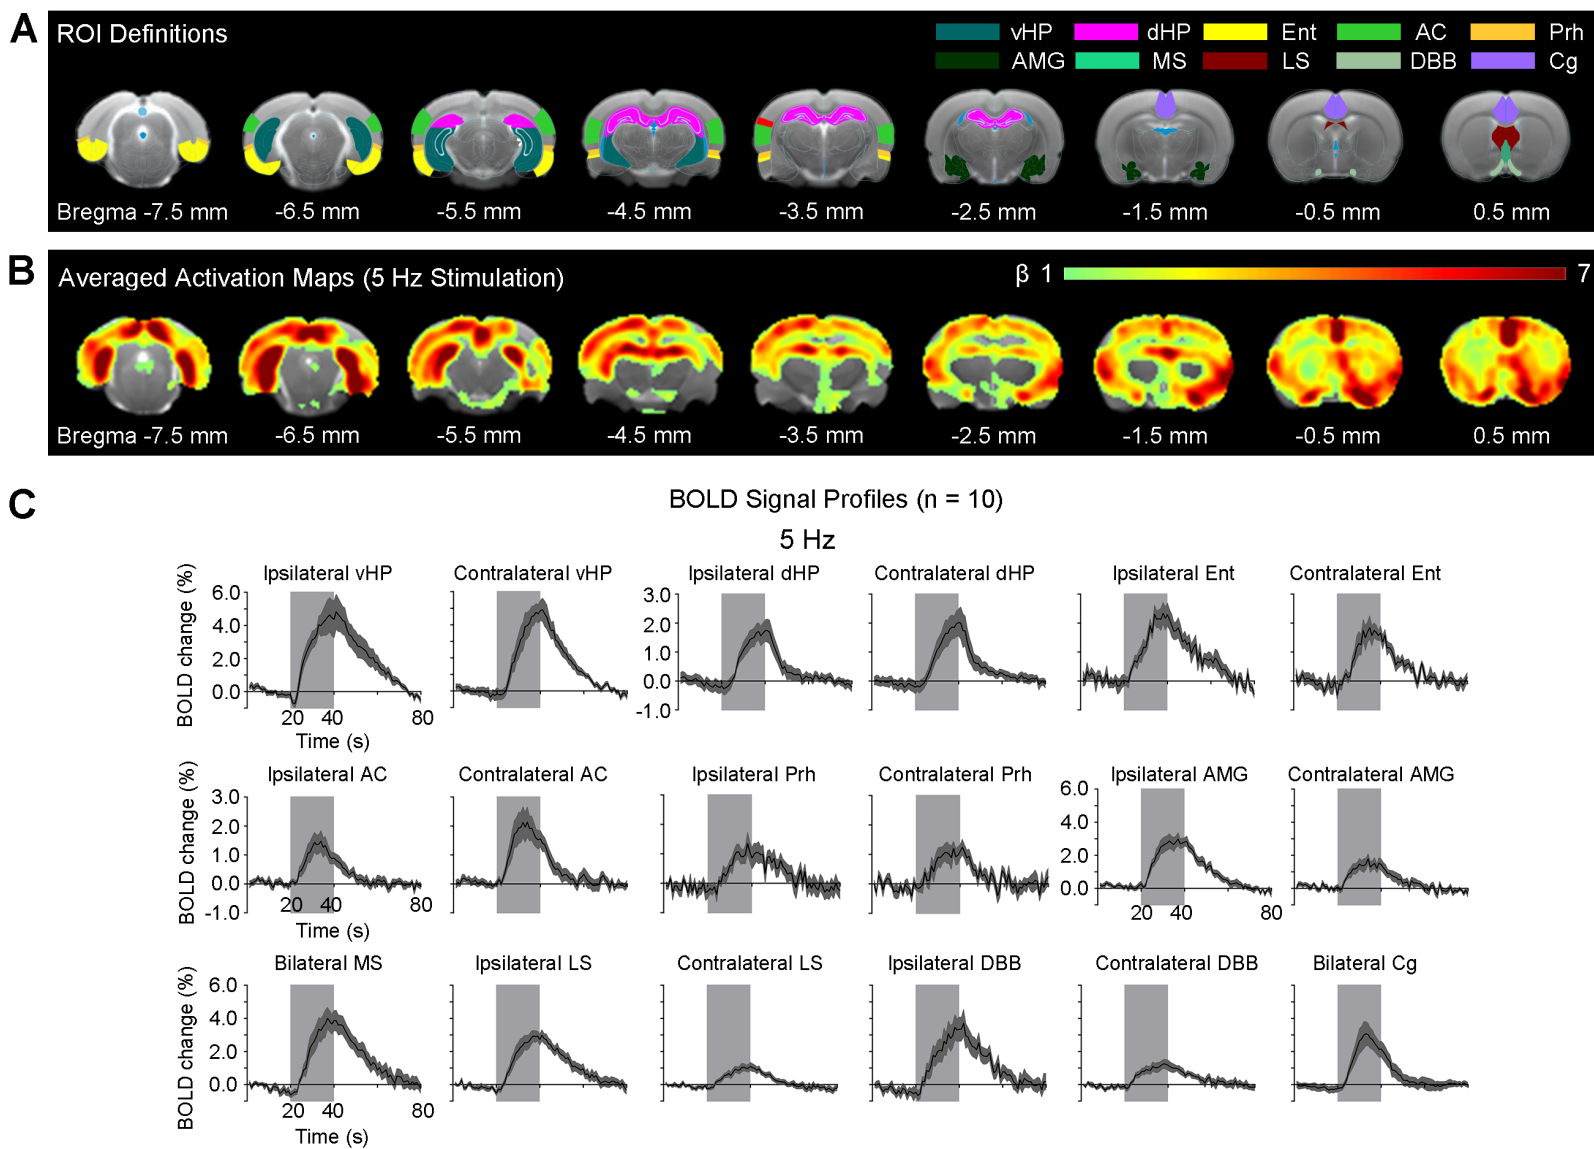

**A**

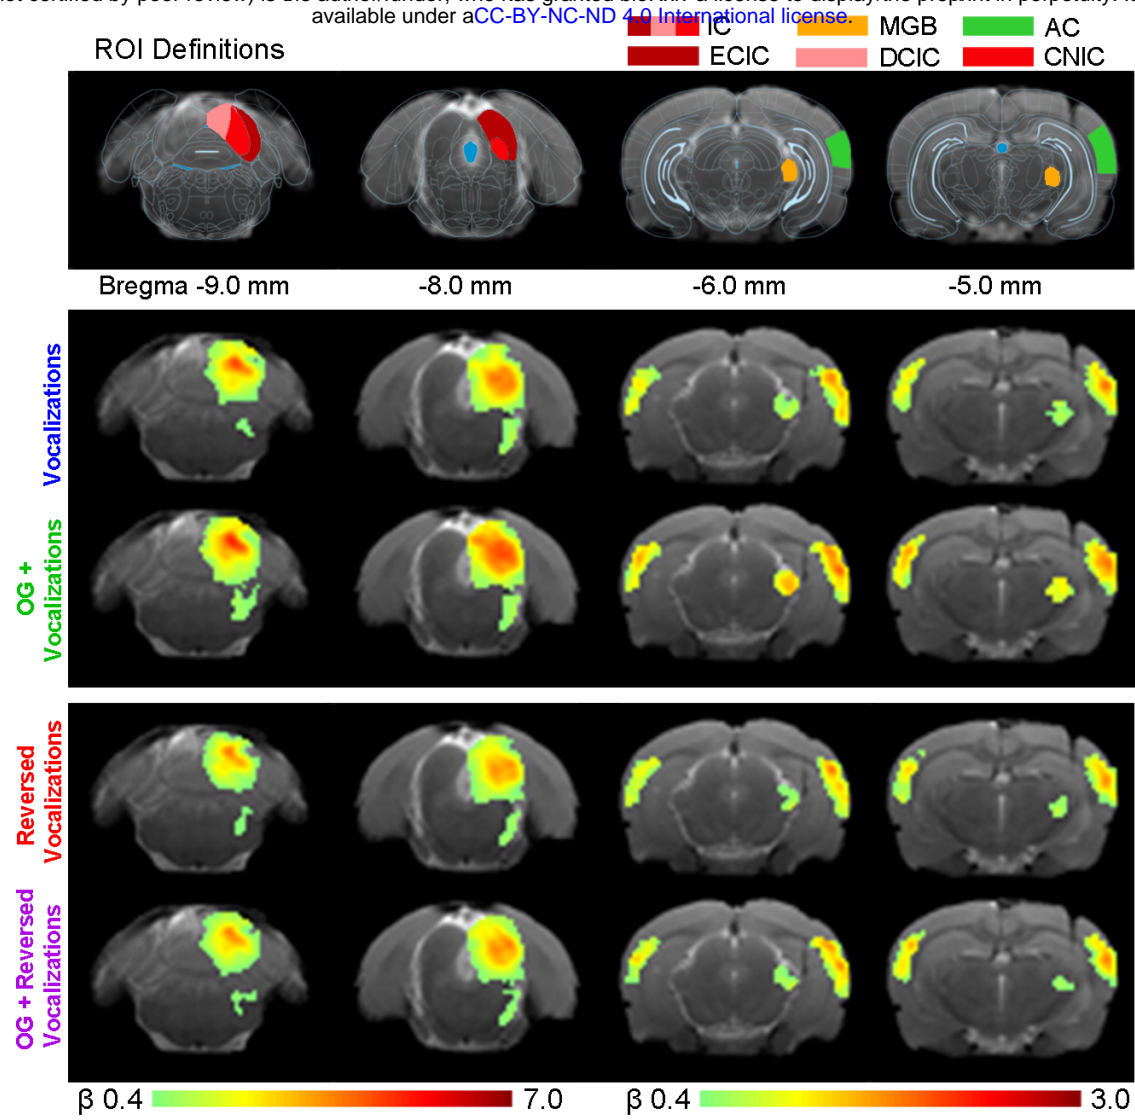

**B**

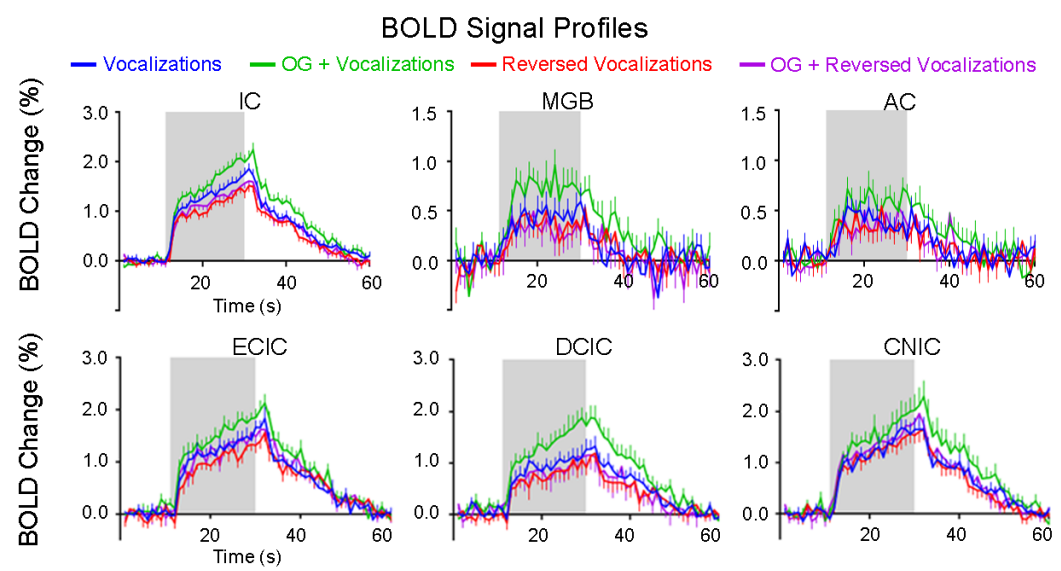

**C**

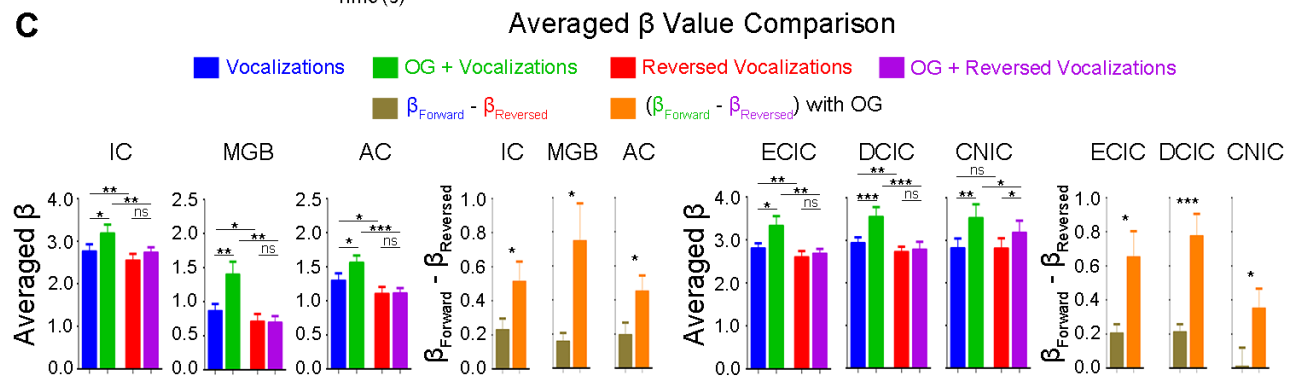



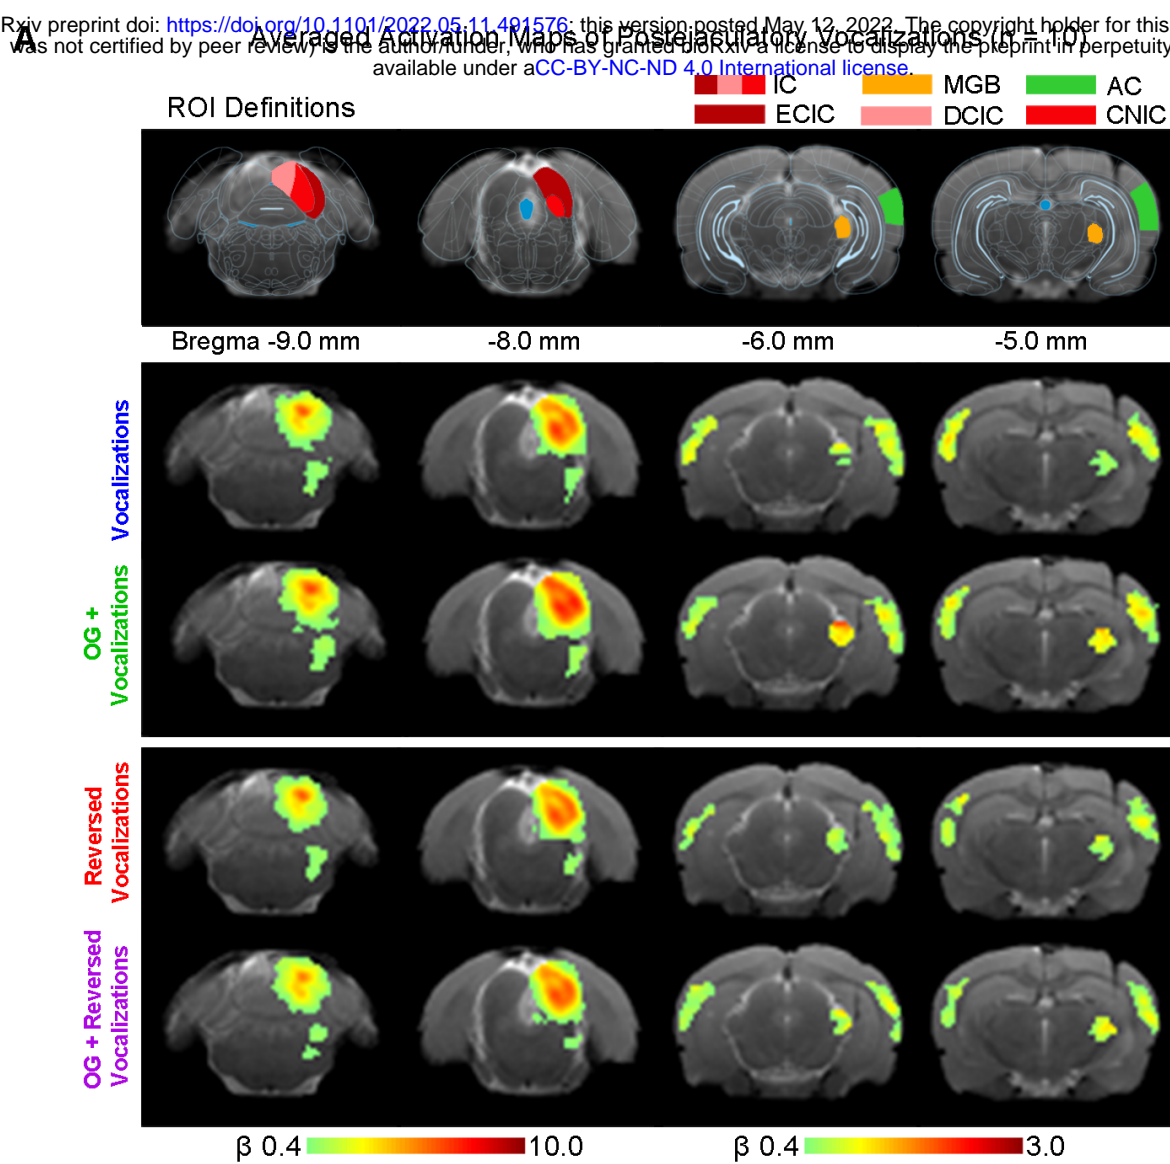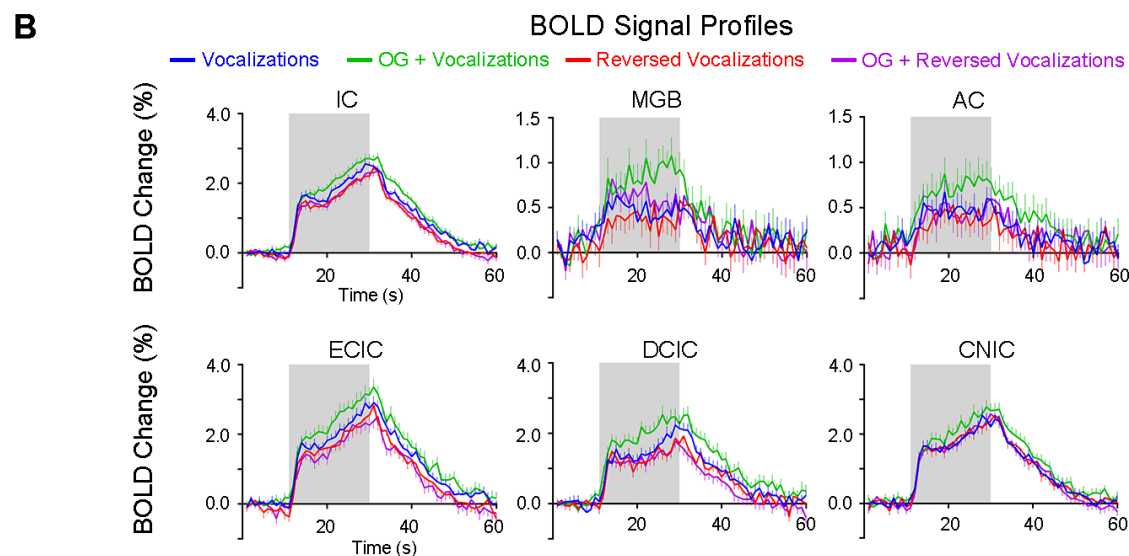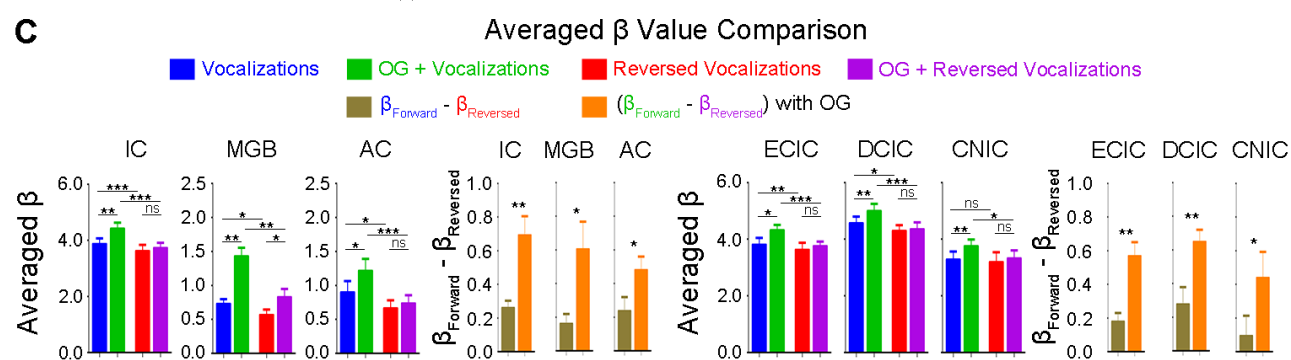

**A**

## Averaged Activation Maps of Broadband Noise (n = 8)

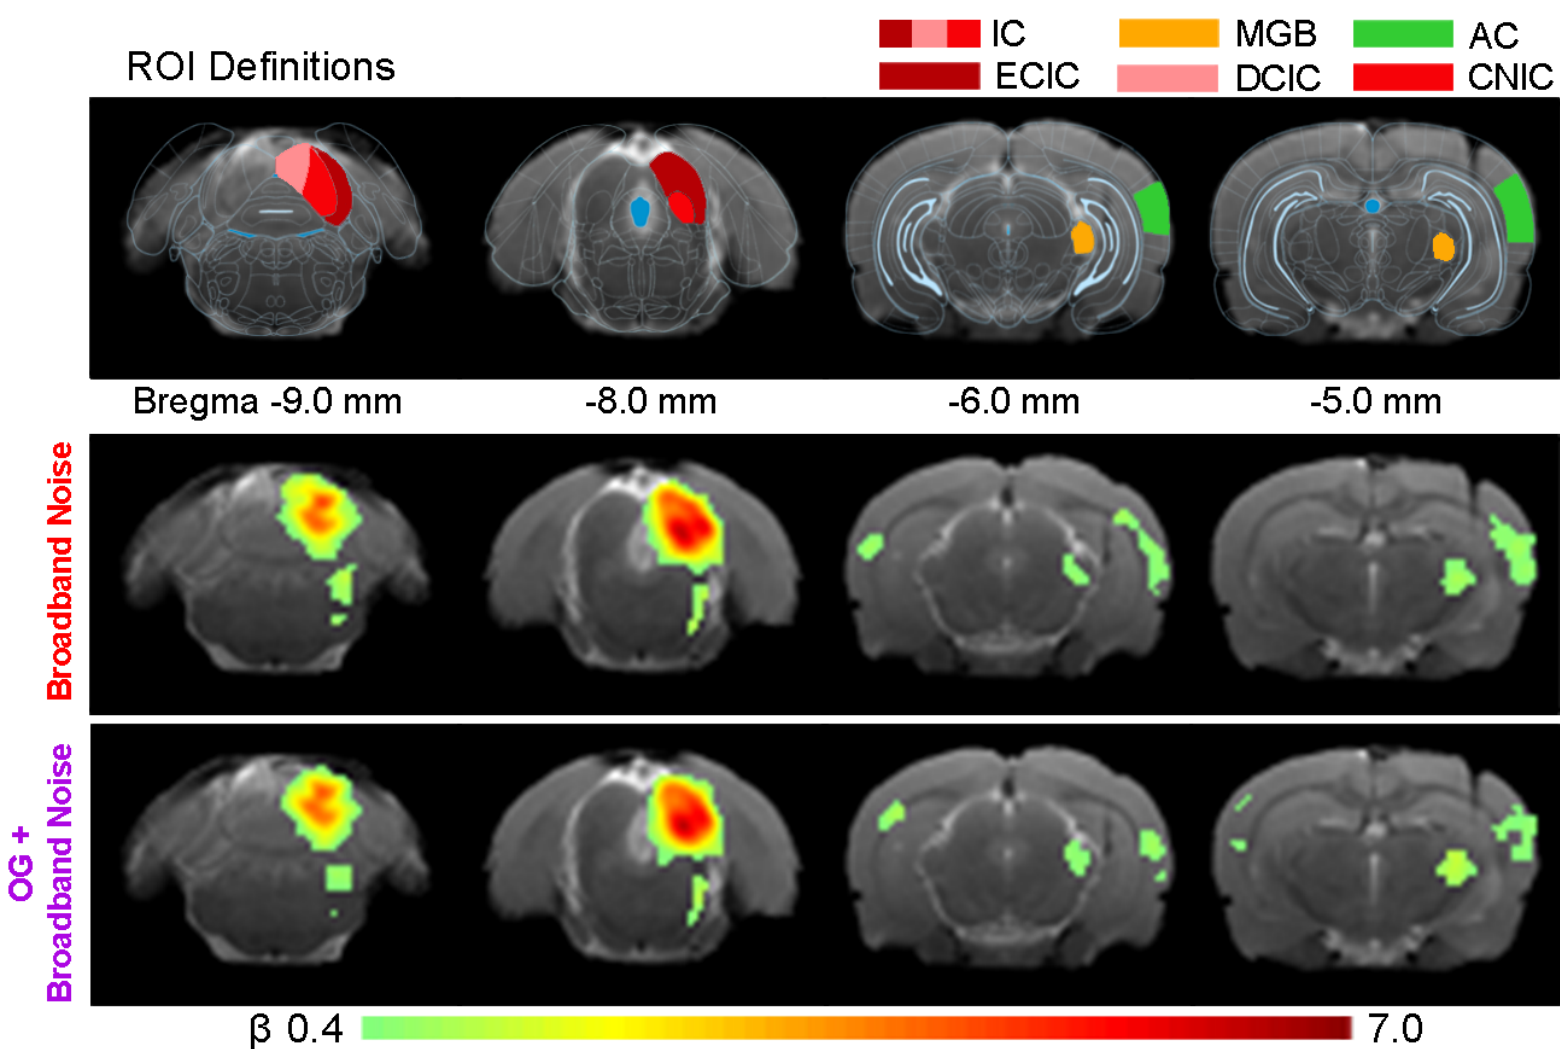

**B**

## BOLD Signal Profiles & Average $\beta$ Value Comparison

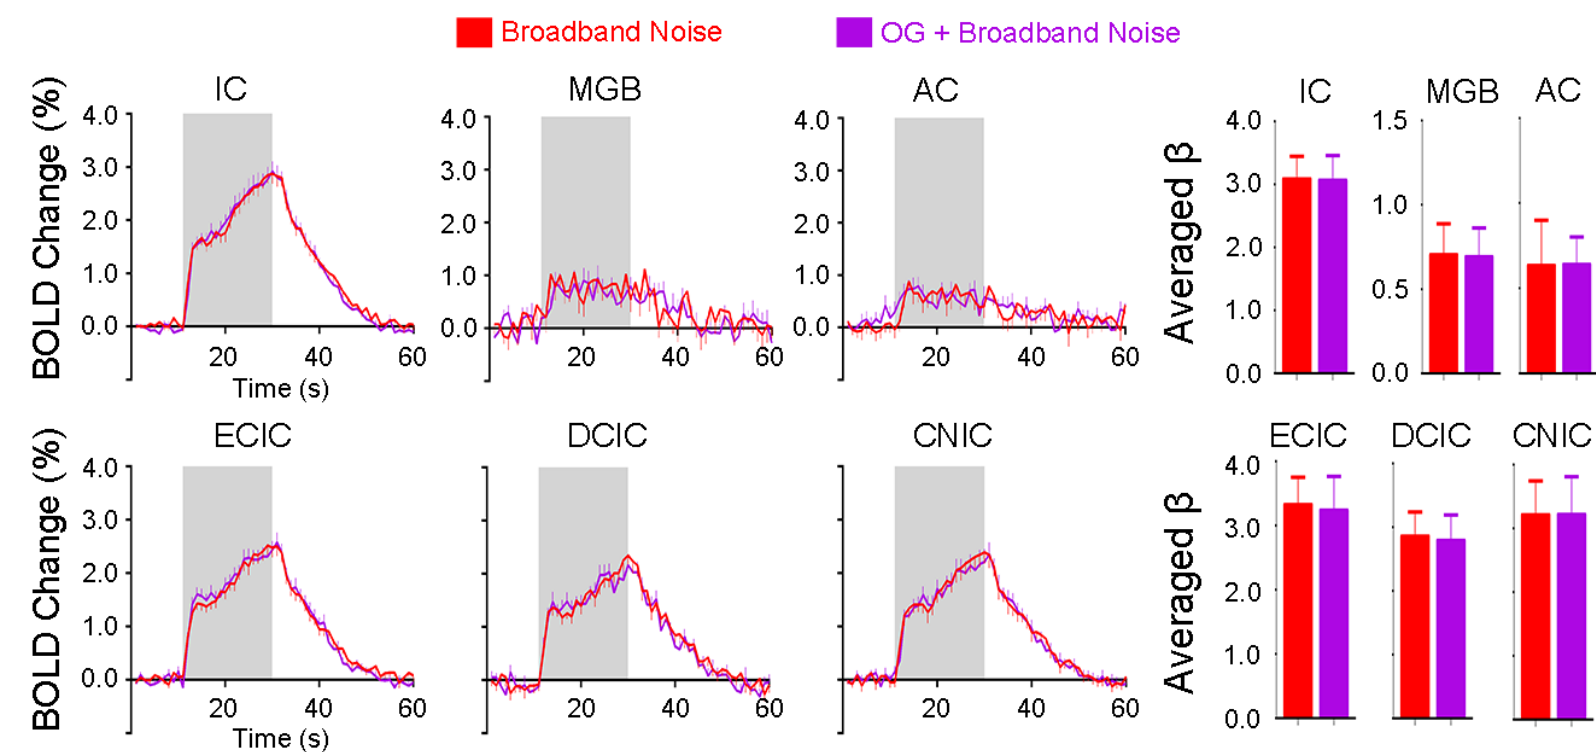

# A

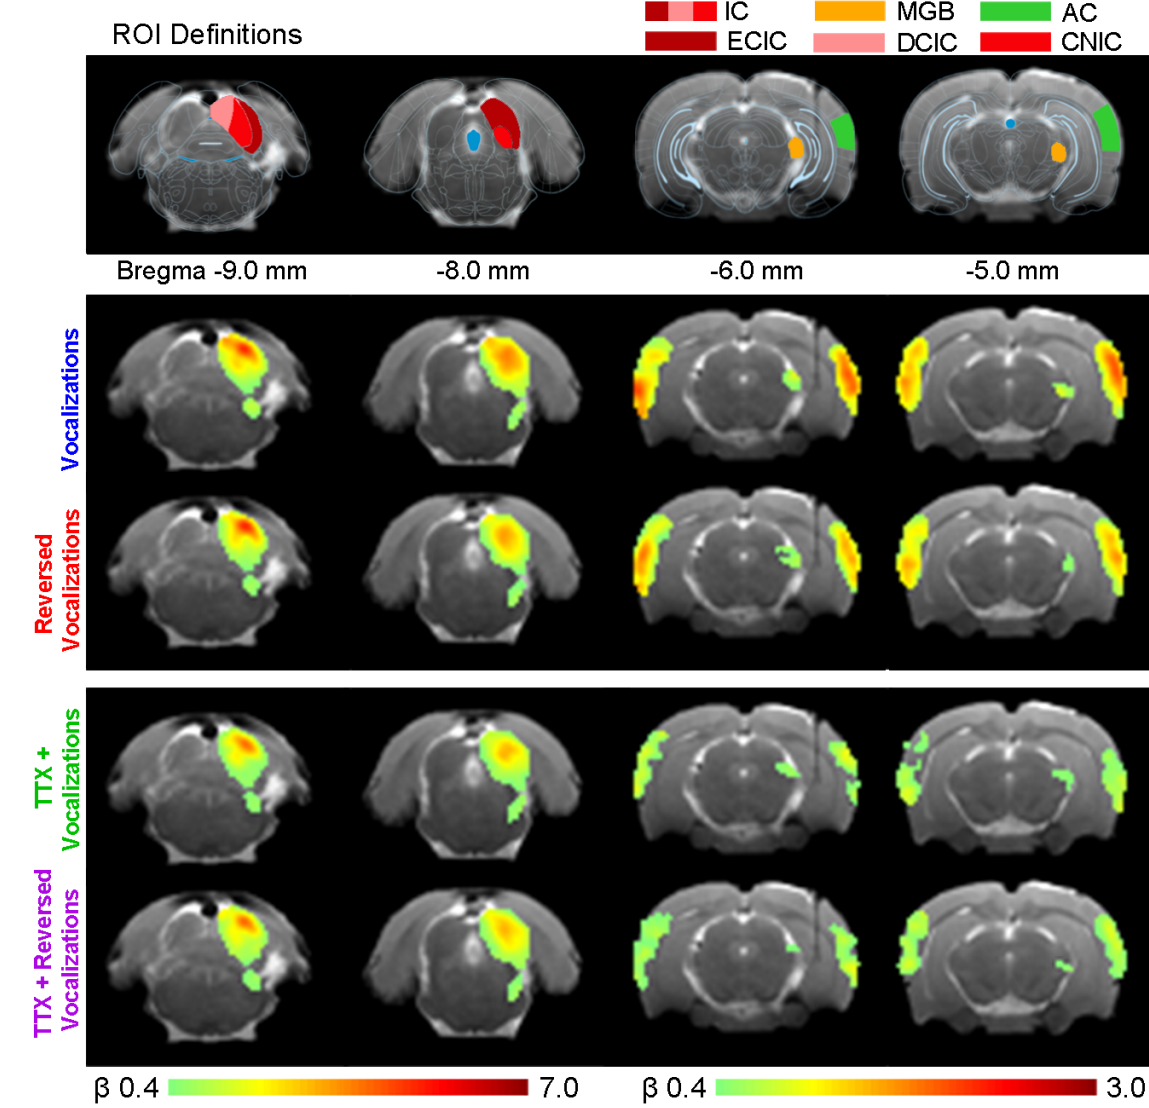

# B

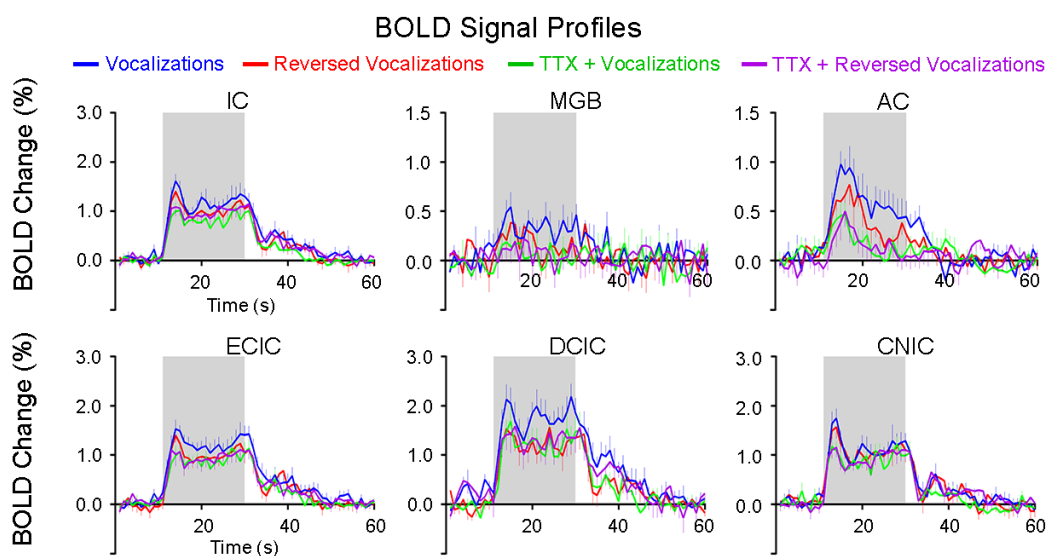

# C

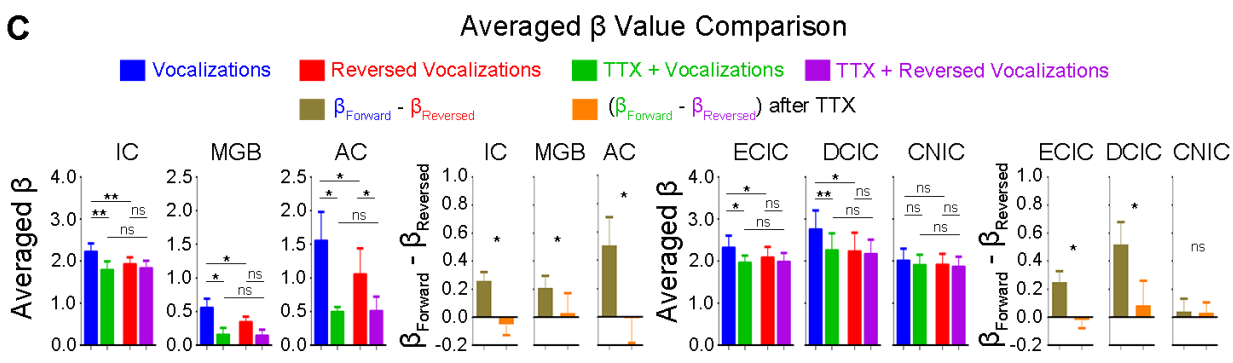

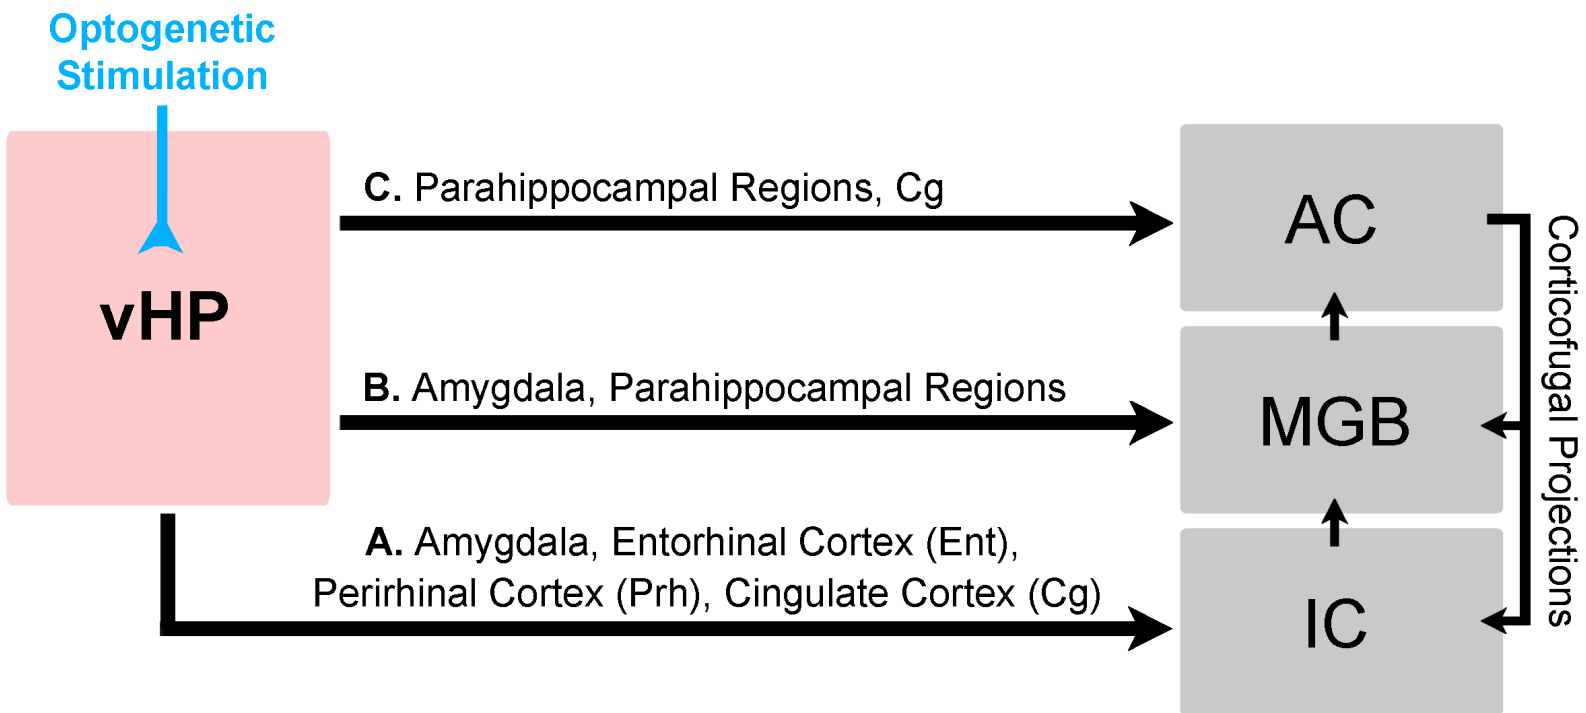

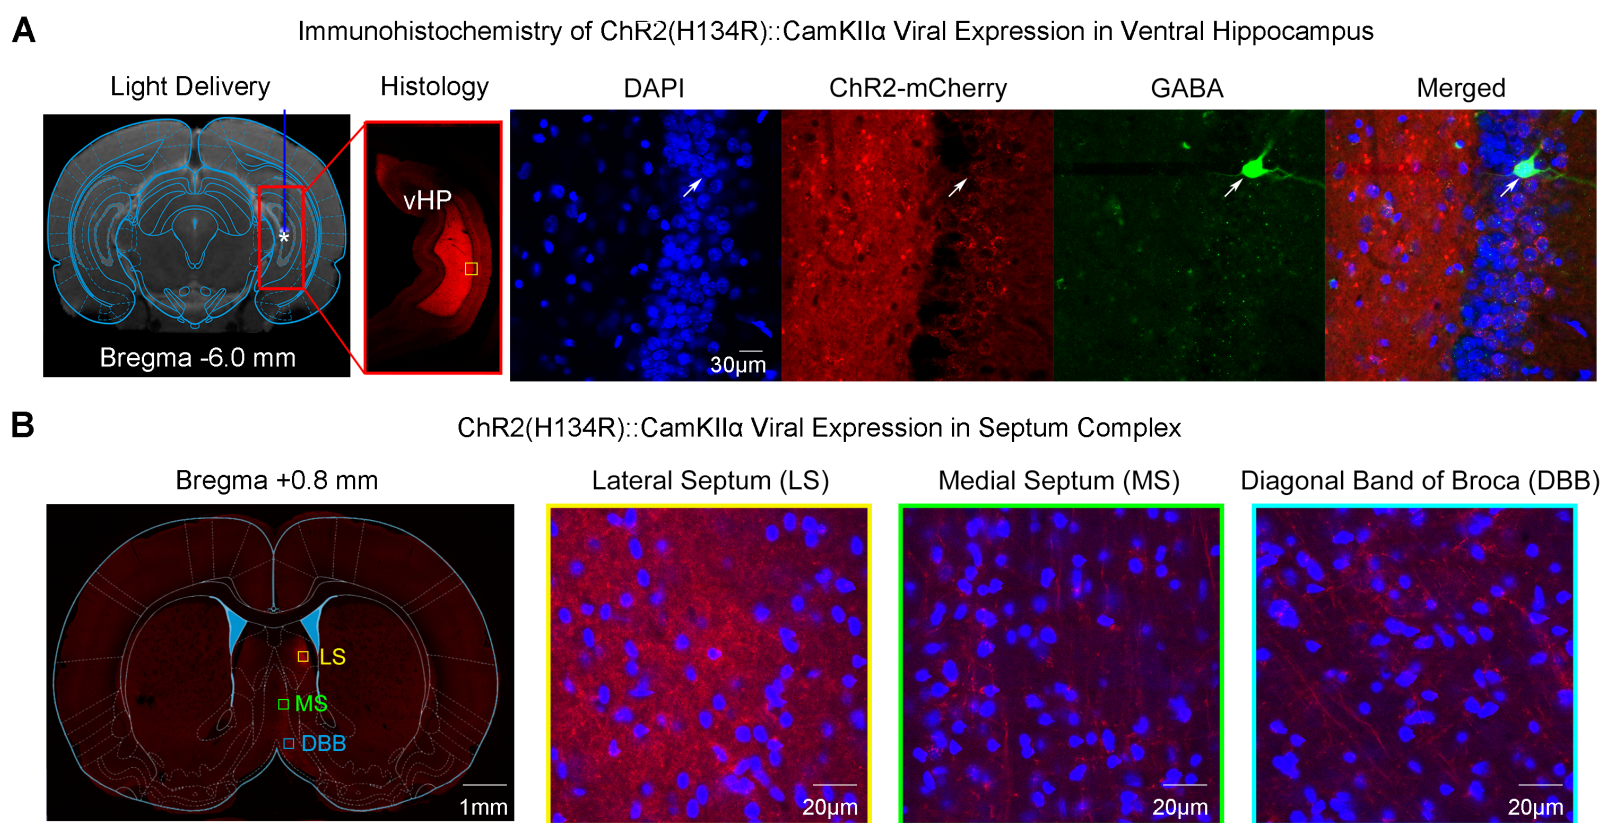

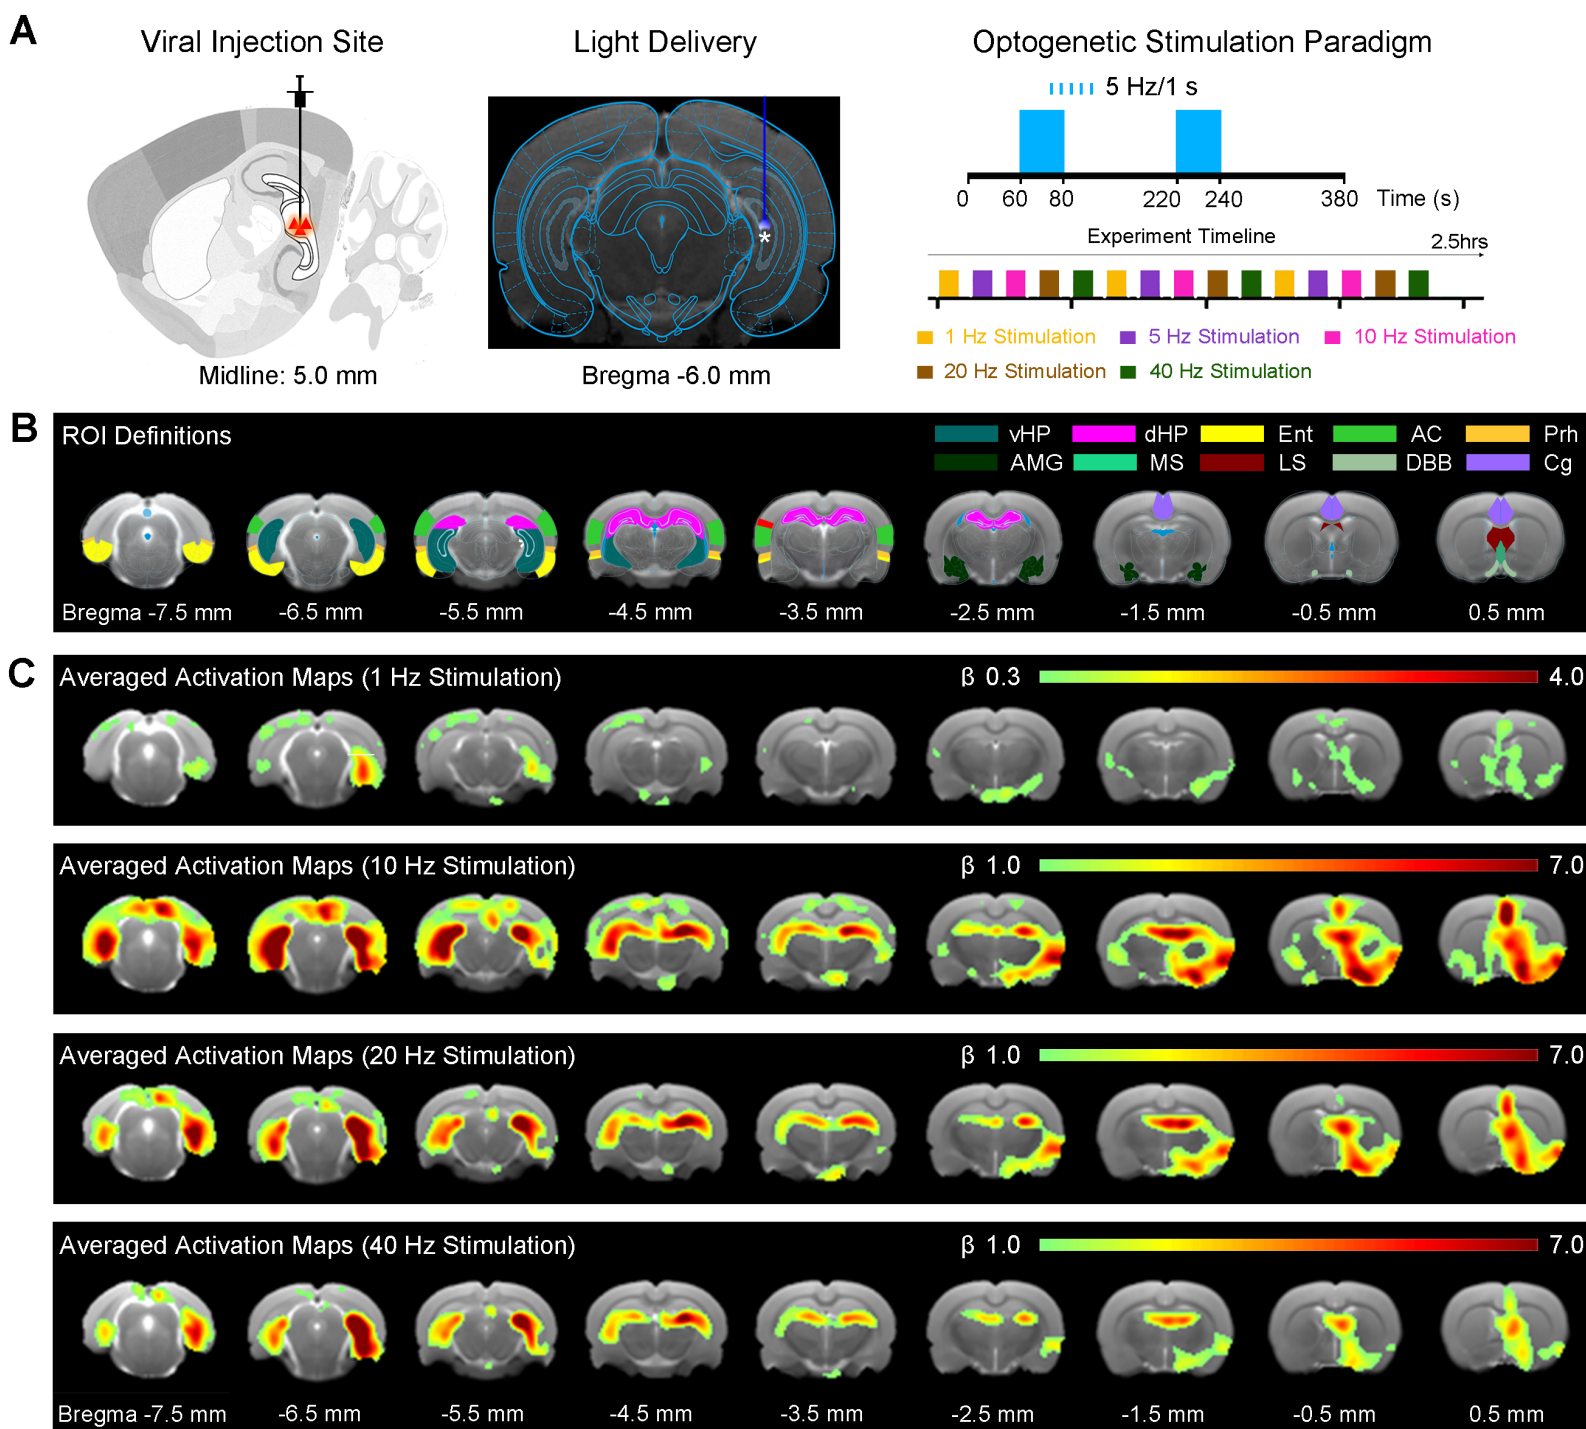

# A Vocalization Experiments Stimulation Paradigm

— Forward Vocalizations    — Reversed Vocalizations    — Optogenetic Stimulation

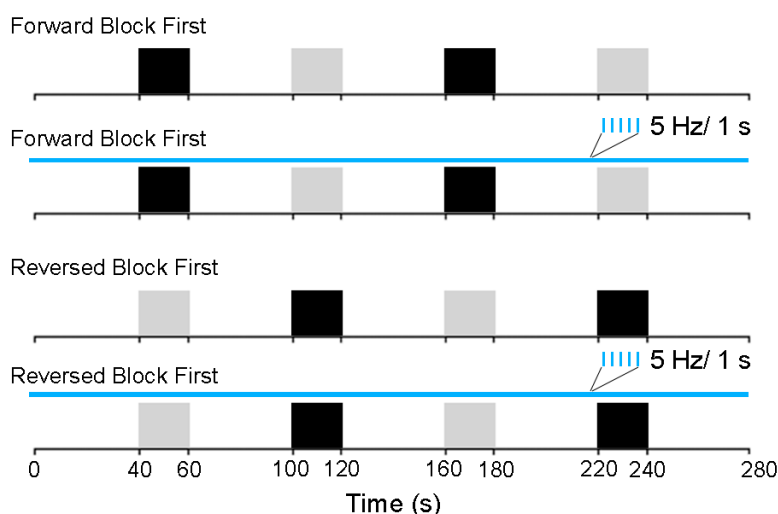

## B Temporal Waveform

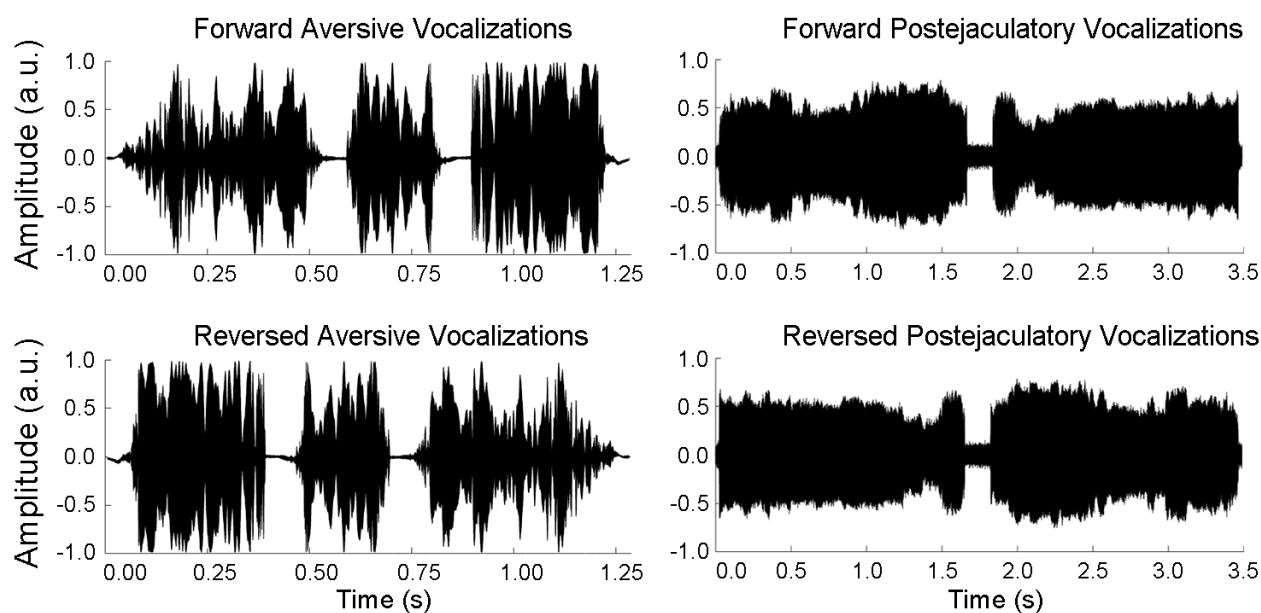

## C Spectrogram

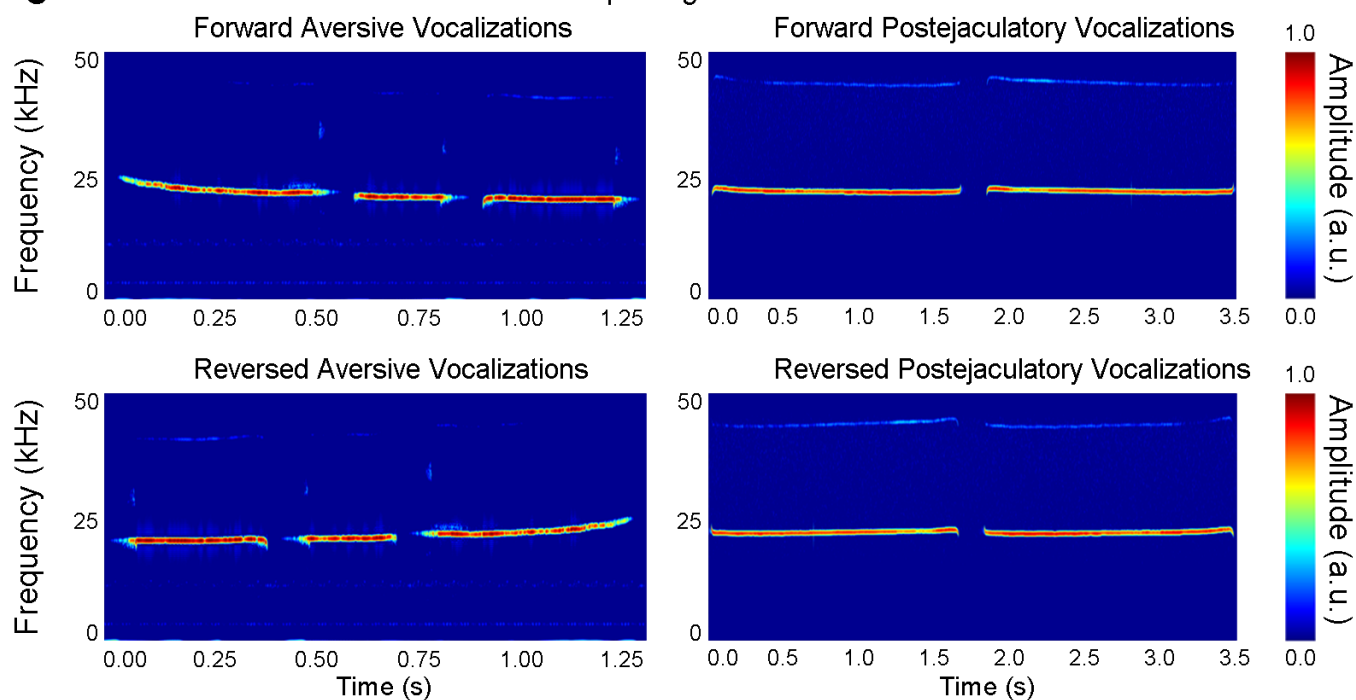

## A Broadband Noise Experiments Stimulation Paradigm

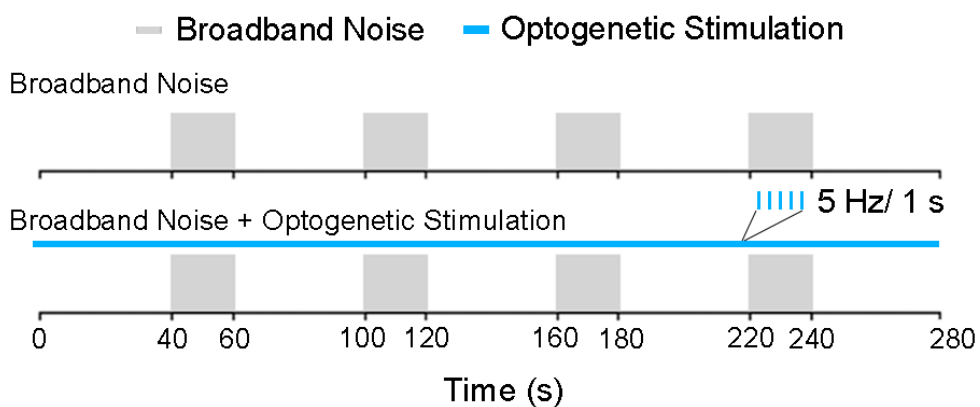

## B

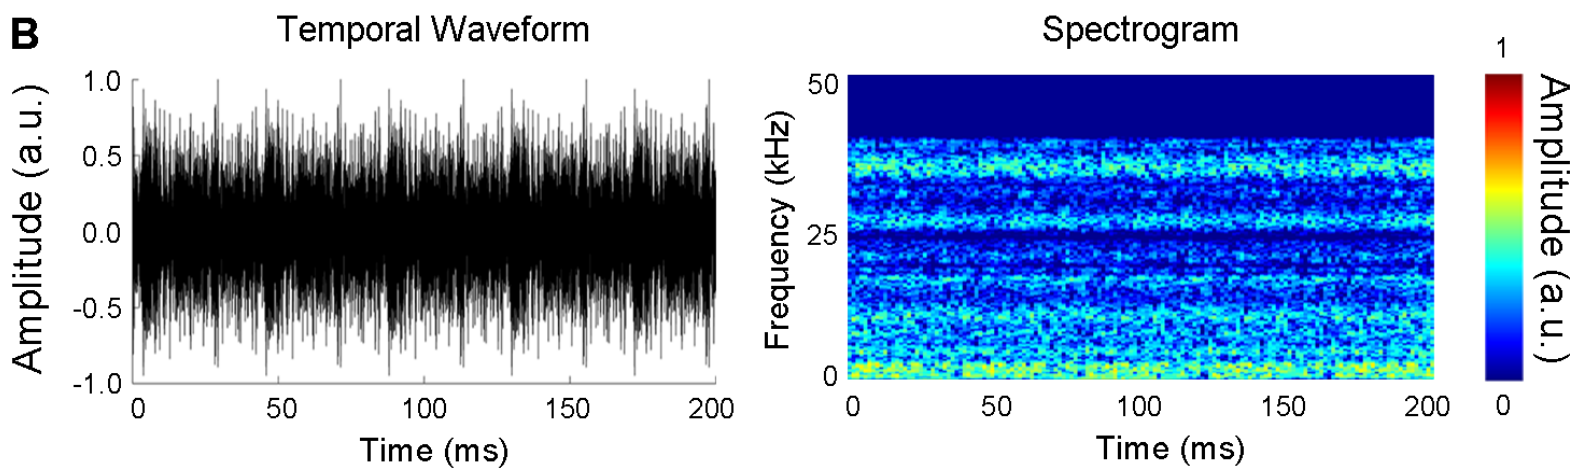



# A Illustration of TTX Infusion Setup

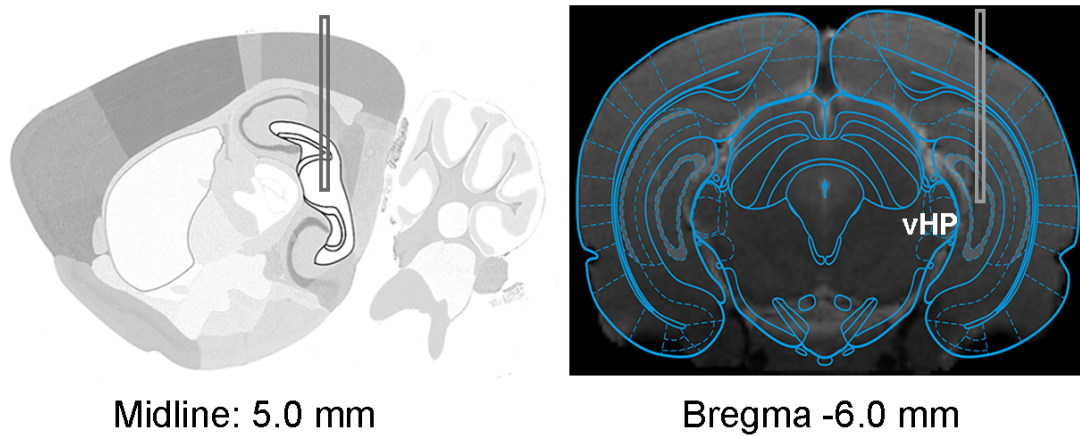

## B Experiment Protocol and Stimulation Paradigm

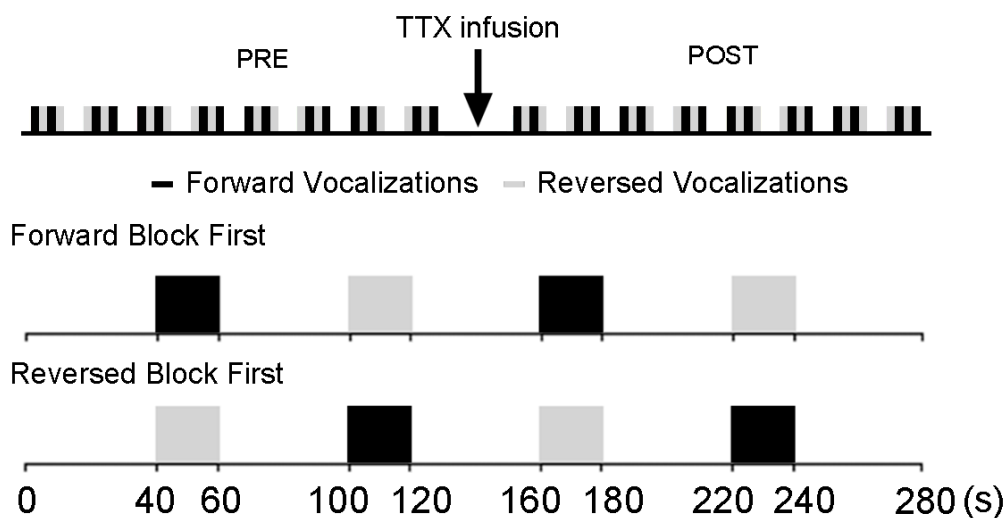

## C Temporal Waveform

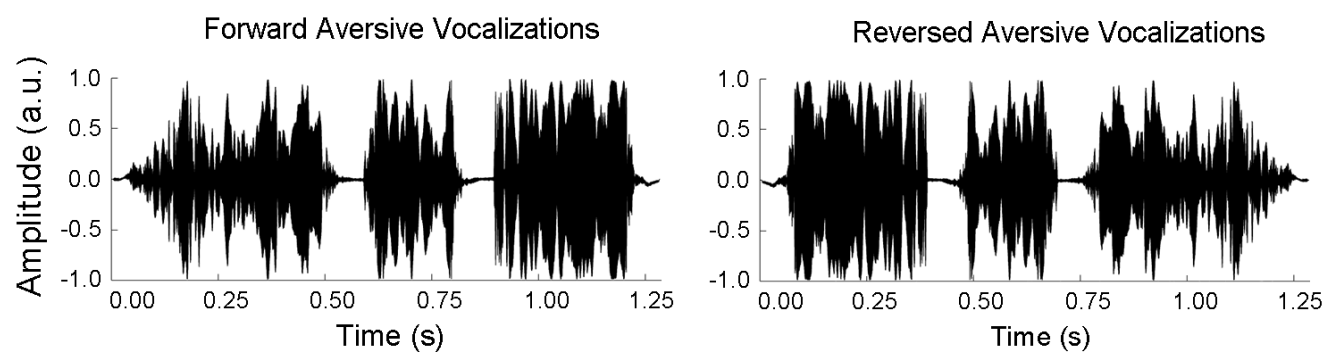

## D Spectrogram

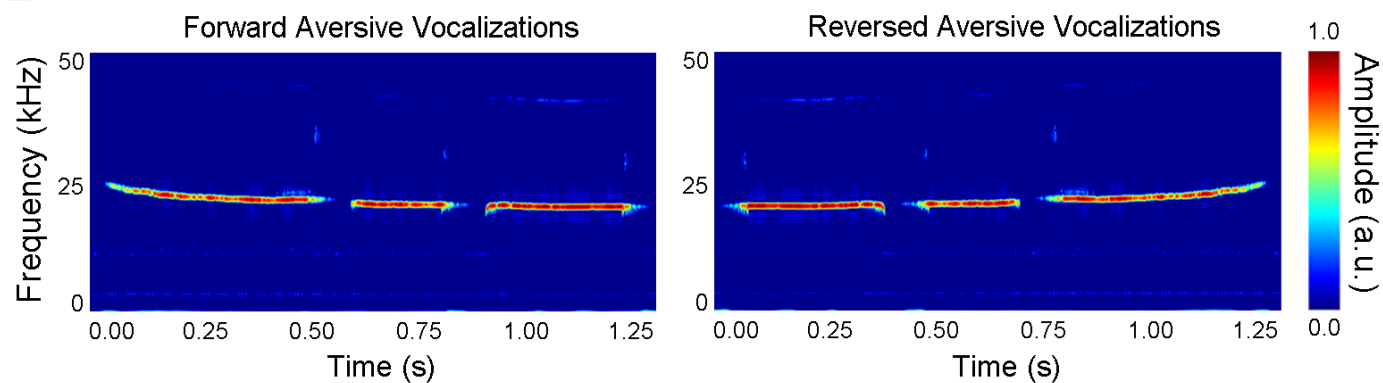

Source: http://biorxiv.org/content/10.1101/2022.05.11.491576v1.full.pdf
